# 1 **Probing inter-areal computations with a cellular resolution two-photon** 2 **holographic mesoscope**

3 Lamiae Abdeladim<sup>1\*</sup>, Hyeyoung Shin<sup>1\*</sup>, Uday K. Jagadisan<sup>1\*</sup>, Mora B. Ogando<sup>1</sup>, Hillel Adesnik<sup>1,2\*\*</sup>

4 <sup>1</sup>Department of Molecular and Cell Biology, University of California, Berkeley

5 <sup>2</sup>The Helen Wills Neuroscience Institute

6 \* Equal contributions

7 \*\* Corresponding author

8

9

## 10 **Summary**

11

12 Brain computation depends on intricately connected yet highly distributed neural networks. Due to the  
13 absence of the requisite technologies, causally testing fundamental hypotheses on the nature of inter-  
14 areal processing have remained largely out-of-reach. Here we developed the first two photon holographic  
15 mesoscope, a system capable of simultaneously reading and writing neural activity patterns with single  
16 cell resolution across large regions of the brain. We demonstrate the precise photo-activation of spatial  
17 and temporal sequences of neurons in one brain area while reading out the downstream effect in several  
18 other regions. Investigators can use this new platform to understand feed-forward and feed-back  
19 processing in distributed neural circuits with single cell precision for the first time.

20

21

## 22 **Introduction**

23

24 The neural computations that support sensation, cognition and behavior depend on the precise  
25 coordination of neural activity patterns within and across widely separated brain areas. Recent advances  
26 in optogenetics and three-dimensional (3D) light patterning (Adesnik and Abdeladim 2021, Ronzitti 2017)  
27 have enabled investigators to causally probe how the activity of specific neural ensembles impact  
28 computation and drive behavior (Chettih 2019, Carillo-Reid 2016, Oldenburg 2022, Marshel 2019,  
29 Dagleish 2020, Russel 2019, Daie 2021, Buetfering 2022), but only in small, circumscribed regions of the  
30 brain on the order of  $<1\text{-}2\text{mm}^2$ . These techniques rely on phase modulation of the optical wavefront with  
31 a spatial light modulator (SLM) allowing the user to selectively target and photo-stimulate neural  
32 ensembles of interest. Despite the power of these new read/write optogenetic approaches, the inability  
33 to apply them to distributed brain networks has prevented investigators from causally probing the logic  
34 and principles of inter-areal communication that are central to brain function. A new technology that  
35 could overcome this technical barrier would allow neuroscientists to address key outstanding questions  
36 for the first time, which could have profound importance for understanding brain function in health,  
37 disease, and neural development.

38 The recent introduction of mesoscale two photon (2p) microscopes, which can sample neural  
39 activity with micron precision across up to  $25\text{mm}^2$  of brain tissue, have vastly increased the ability of  
40 investigators to acquire physiological data on distributed neural populations in behaving animals  
41 (Sofroniew 2016, Stirman 2016, Yu 2021, Romyantsev 2020, Kim and Shnitzer 2022, Ota 2022, Machado  
42 2022). While these 2p mesoscopes can monitor cellular activity, they have no ability to perturb it with  
43 high spatiotemporal precision, preventing the user from probing causal relationships between patterns  
44 of activity in connected brain areas and behavior. Thus, if it were possible to develop a 2p mesoscope  
45 that can not only measure but also manipulate neural activity with cellular resolution, neuroscientists  
46 could use such a system to address longstanding mysteries of long-range neural communication in the  
47 brain.

48           However, there are multiple significant technical challenges to achieving high holographic  
49 resolution optogenetics in a 2p mesoscope. These include addressing the lower numerical aperture (NA)  
50 of the optical system and the need for mechanical rotation of the entire imaging system for accessing  
51 lateral brain areas. Furthermore, existing commercial 2p mesoscopes were not designed for the  
52 integration of holographic systems, requiring a significant redesign of the mesoscope build. To overcome  
53 these challenges, we designed and optimized a flexible 3D holographic system fully integrated onto a 2p  
54 random-access mesoscope (2p-RAM) that enables single-cell resolution holographic photo-stimulation of  
55 neural ensembles in the brain. We tested and validated the optical capabilities of this new read/write  
56 platform to measure and recreate highly specific patterns of activity in the brain within a large FOV. In  
57 particular, we demonstrated holographic emulation of visually evoked neural activity at the mesoscale by  
58 specific co-activation of functionally defined ensembles. We further showed how one can use this system  
59 to probe functional interactions between distant brain regions. Finally, we showed that we can decode  
60 the identity of the specific photo-stimulus purely from the modulation of activity of postsynaptic neurons  
61 in downstream areas.

62           Together, these data illustrate how our 2P holographic mesoscope enables the user to probe  
63 causality both at the local and the interareal level with single-cell resolution. By providing the means for  
64 whole new classes of experiments, this novel technology could have a substantial impact on neuroscience  
65 research and on potential therapeutic applications.

66

## 67 **Results**

68

### 69 **A 2P-RAM mesoscope with temporally focused 2P holographic illumination**

70

71 We designed a mesoscale all-optical read/write platform around a two-photon random access mesoscope  
72 (2P-RAM, Sofroniew 2016) system (**Fig. 1a-c, Supplementary Fig. 1**) that is commercially available  
73 (Thorlabs, Inc.). The key features of this imaging system that make it a powerful tool for studying inter-  
74 areal communication are its nominal 5x5mm FOV, a fast remote focusing system for FOV curvature  
75 correction and multiplane imaging, and four automated axes of motion for positional flexibility (**Fig. 1c**).  
76 We sought to develop a mesoscale holographic optogenetics system that achieves single cell resolution  
77 photo-stimulation despite the lower numerical aperture of the optical path and that could likewise  
78 address the imaging plane curvature. Furthermore, we aimed for an optical design that does not  
79 compromise the 4-axis movement capabilities of the 2P-RAM system, since they are essential for  
80 executing a diverse array of neurobiological experiments. We therefore designed a compact and re-  
81 dimensioned 3D holographic module that employs temporal focusing to confine excitation axially ('3D-  
82 SHOT', three-dimensional sparse holographic optogenetics with temporal focusing Mardinly 2018, Pégard  
83 2017). To preserve all translational axes of the entire system, we built the holographic module on an  
84 extension breadboard attached to the movable main frame of the microscope (**Fig. 1b, Supplementary**  
85 **Fig. 1, Supplementary note 2**). In 3D-SHOT, an initial blazed grating generates a temporally focused disc  
86 of light that is magnified and replicated in multiple locations within a 3D volume by a spatial light  
87 modulator (SLM). The 3D light pattern is then relayed onto the objective image space through a set of 4f-  
88 systems (**Fig. 1c**). Given the large distance on the mesoscope between the photostimulation laser output  
89 and the 3D-SHOT module, we added a non-magnifying telescope after the laser to control the divergence  
90 of the beam impinging on the diffraction grating. Preserving the alignment invariance of the holographic  
91 path with the motorized movements of the mesoscope is a key challenge. To address this (**Fig. 1c**), we  
92 first combined the imaging and photostimulation beam before entering the multi-stage periscope so that  
93 the photostimulation beam maintains invariance with X and Y frame translations. Second, we replaced  
94 the last periscope mirror with a long-pass dichroic that directs the imaging beam (920nm) onto the vertical  
95 breadboard and the photostimulation beam (1030nm) onto the extension breadboard so that the latter

96 maintains invariance with rotation. Third, we recombined both beams with a short-pass dichroic placed  
97 right before the mesoscope tube lens on the vertical breadboard. Consequently, the holographic module  
98 is invariant within all dimensions controlled by the motorized microscope frame, X, Y translations and  
99 rotation. We recovered axial translation by adding a motorized stage for animal positioning along the  
100 vertical axis, additionally mounted on a goniometer to ensure that imaging and photo-stimulation are fully  
101 orthogonal to the cranial window surface.

102  
103 To quantify the optical resolution of the mesoscale holographic system, we first measured the spatial  
104 profile or ‘point spread function’ (PSF) of single two-photon excitation spots (**Fig. 1d-e**) which measured  
105  $9\mu\text{m} \pm 0.7\mu\text{m}$  in the lateral dimension and  $32\mu\text{m} \pm 1.6\mu\text{m}$  in the axial dimension (mean  $\pm$  s.d, n=538  
106 holograms arranged in a 2D grid, see also **Fig. 1g, Supplementary Fig. 2**). Although the axial resolution  
107 values are slightly larger than those previously reported for 3D-SHOT in a conventional 2p microscope  
108 ( $\sim 20\mu\text{m}$  in Mardinly et al.,  $\sim 28\mu\text{m}$  in Pégard et al.), they are consistent with the modestly lower NA of  
109 the mesoscope objective (**Supplementary note 1**). Nevertheless, the range of optical PSFs across the  
110 entire photostimulation field is within the range of axial resolutions reported in previous single-cell 2P  
111 holographic optogenetics studies (Pégard 2017, Mardinly 2018, Packer 2012) and allows for quasi single-  
112 cell resolution targeted photostimulation. We then determined the extent of our holographic field-of-  
113 view (FOV) which is equivalent to the total accessible FOV range of the SLM at the system’s magnification.  
114 We set the FOV limits to the farthest accessible holograms without aliasing which corresponded to a total  
115 lateral FOV of  $\sim 950\mu\text{m} \times 990\mu\text{m}$  (**Fig. 1g**), corresponding to 80% usable SLM FOV over the nominal 1.2  
116 mm FOV of the SLM at this magnification. We compensate for the inherent decrease of diffraction  
117 efficiency laterally across the FOV by adjusting the power delivered to each spot according to its spatial  
118 location (**Supplementary Fig. 2**). Next, we generated multiple holograms spatially arranged in a 3D point-  
119 cloud (**Fig. 1f**). We then measured the axial optical PSFs in 3D and found that they were mostly invariant  
120 within a digital defocusing range of  $220\mu\text{m}$  (**Fig. 1h**). A potential challenge for holographic targeting on  
121 the 2P-RAM mesoscope is the large microscope field curvature,  $160\mu\text{m}$  over the 5mm imaging FOV,  
122 mostly introduced by the mesoscope objective. We hence quantified the flatness of our holographic FOV,  
123 by measuring the axial locations of holograms generated with equi-Z SLM coordinates and found the  
124 maximal peak-to-valley to be  $\sim 40\mu\text{m}$  which is well within the addressable defocus range of the SLM and  
125 can be corrected for without compromising 3D targeting (**Supplementary Fig. 2**). Another potential  
126 challenge for multiphoton holographic optogenetics on the 2P-RAM mesoscope is the introduced  
127 dispersion from the 4f lenses and the large mesoscope optics. We estimated the total group delay  
128 dispersion (GDD) introduced by the holographic path to be  $\sim 15000\text{fs}^2$  (**Supplementary table 2**). For  
129 relatively broad pulses commonly used in multiphoton optogenetics ( $\sim 400\text{fs}$ ), the broadening of the  
130 pulse width at the objective focus is minimal, thus discarding the need for a pulse compression unit on  
131 the holographic path.

132  
133 Finally, we assessed holographic targeting stationarity with X, Y translations and rotation, which is  
134 essential for accurate optical generation of neural activity patterns despite movement of the mesoscope  
135 relative to the brain. We found that the error between original hologram location and at displaced stage  
136 positions remained less than  $3\mu\text{m}$  over a  $\pm 3\text{mm}$  translation range and a  $\pm 2.5^\circ$  rotation angle range  
137 demonstrating alignment invariance with mesoscope frame movements (**Supplementary Fig. 3**).

### 138 139 ***In vivo* 2P photostimulation on the 2P-RAM mesoscope**

140  
141 Next, we tested our system for *in vivo* all-optical control of neural ensembles in awake mice. We took  
142 advantage of a transgenic line that we recently developed (Vglut1-Cre;Ai203) (Bounds, 2021) which  
143 provides widespread and stable co-expression of the potent opsin ChroME and the sensitive calcium

144 indicator (GCaMP7s) (**Fig. 2a**). We were able to photoactivate selected individual cells within the  
145 holographic FOV while recording from thousands of neurons within the mesoscale imaging FOV (**Fig. 2b-**  
146 **e**). Sequential photostimulation at 75mW/spot (10 × 10 ms pulses at 50Hz) elicited significant time-locked  
147 responses in 70% of targeted cells (**Fig. 2c,d, Supplementary Fig. 4**). This demonstrates effective  
148 holographic photostimulation despite the slightly larger optical axial resolution. To carefully quantify the  
149 effective spatial resolution of holographic photo-stimulation, we recorded physiological point-spread-  
150 functions (PPSFs) all optically in awake animals by digitally offsetting the holograms relative to the center  
151 of target cells and recording evoked calcium activity on the target cells. We estimated the lateral PPSF to  
152 be 23 μm and the axial PPSF to be 49 μm (gaussian fit full-width-half-maximum, n=3 cells). Despite the  
153 lower NA inherent to the mesoscope objective, the achieved effective axial resolution *in vivo* is even lower  
154 than some reported PPSFs in 2p optogenetics studies (80 μm axial FWHM reported in Daie 2021 for  
155 instance). Together, these results demonstrate that the 2p holographic mesoscope achieves single-cell  
156 resolution holographic optogenetics on par with previous implementations on conventional 2P  
157 microscopes.

158  
159 To illustrate how one can use the 2P holographic mesoscope to address key questions related to inter-  
160 areal processing, we sequentially targeted ensembles of neurons in different visual areas while recording  
161 the same set of visual cortical areas via translation of the mesoscope, taking advantage of the system's  
162 targeting invariance to spatial translation. We could thus sequentially activate neural ensembles from four  
163 different cortical areas (V1, PM, RL, and LM) while simultaneously recording activity from six surrounding  
164 visual areas (**Fig. 2f**). Indeed, photo-stimulation in each cortical area elicited robust response in the  
165 holographically targeted cells regardless of where the holographic FOV (~1×1 mm<sup>2</sup>) was relative to the  
166 selected imaging FOV (3.1×3.1 mm<sup>2</sup>). This demonstrates that the new system achieves ensemble  
167 stimulation in any chosen visual area while concurrently recording neural activity from thousands of  
168 neurons in surrounding visual areas.

### 169 **Holographic stimulation of functionally defined ensembles at the mesoscale**

170  
171 A major advantage of two-photon holographic optogenetics is the ability to co-activate ensembles of  
172 neurons based on their functional properties. We thus asked if we could co-activate groups of visual  
173 cortical neurons that share orientation preference (**Fig. 3**). In the mouse visual cortex, orientation  
174 preference shows minimal spatial clustering and thus co-activating an ensemble of co-tuned neurons  
175 required highly precise optical targeting (Ohki & Reid 2007). To test this capability, we measured  
176 orientation tuning curves of V1 neurons and then constructed various ensembles of neurons with shared  
177 orientation preference for 2p holographic stimulation (**Fig. 3b,c**). Indeed, we could successfully photo-  
178 activate groups of co-tuned neurons in V1 (**Fig. 3d**) while recording activity from surrounding areas. To  
179 test whether our holographic stimulation generated functionally specific patterns of neural activity, we  
180 trained a machine learning decoder to discriminate between visual responses evoked by static gratings in  
181 4 orientations. We then asked the decoder to assign responses evoked by photostimulation of co-tuned  
182 ensembles to the 4 orientations of the visual stimulus. The decoder was able to classify holographic photo-  
183 stimuli above chance across both targets and all recorded neurons (**Fig. 3f,g**), demonstrating emulation of  
184 visually evoked activity.

### 185 186 187 **Mesoscale recording of long-range responses to holographic neural activation**

188  
189 One of the major advantages of mesoscale 2p holographic optogenetics should be the ability to detect  
190 and quantify long-range functional interactions between one area and several other brain areas  
191 simultaneously, something not possible with conventional 2p holographic microscopes. To test this, we

192 stimulated ensembles of neurons in visual area LM while recording from neurons across 4-6 other visual  
193 cortical areas in a total 3 mm × 1.8 mm FOV or 2.4 mm × 2.4 mm FOV at 5Hz and 4.5Hz respectively (Fig.  
194 4). We detected both reliably activated and reliably suppressed neurons downstream (**Fig. 4a-c**). As a  
195 control, we compared the distribution of significant responses in stimulation trials with the significant  
196 responses on ‘catch trials’ where photo-stimulation power was set to 0mW (**Fig. 4b**) and showed that  
197 holographic stimulation induces postsynaptic modulation above the statistical false positive rate (**Fig. 4b**,  
198 **Supplementary Fig. 5,6**). We next quantified the net modulatory effect of LM photo-activation on the  
199 other imaged visual areas as well as area LM itself, excluding cells less than 25 μm from the holographic  
200 targets. We observed a significant albeit modest suppression of mean activity across all downstream  
201 areas, with LM neurons showing the strongest suppression and PM neurons showing the least (**Fig. 4d,e**).  
202 Finally, we asked if activating different neural activity patterns in one cortical area (LM) induces  
203 differentiable patterns of modulation in downstream areas. To test this idea, we used machine learning  
204 algorithms to decode, trial by trial, the identity of the holographically induced pattern in LM from the  
205 neural responses in the other visual areas (**Fig. 4f,g, Supplementary Fig. 7**). Indeed, we could properly  
206 predict the holographic pattern on each trial significantly above chance levels, despite excluding all  
207 measurements taken from LM itself. This indicates that photostimulation of even relatively modestly sized  
208 neural ensembles (n=3-20 cells) is sufficient to drive distinct, distributed, and informative patterns of  
209 neuromodulation downstream at the cellular scale.

210

## 211 Discussion

212

213 We designed, built and validated the first multiphoton holographic mesoscope. This technology is the first  
214 to offer targeted photostimulation with single-cell resolution with simultaneous large-scale recording of  
215 neural activity across several cortical areas in a nominal 25mm<sup>2</sup> FOV. We demonstrated the new system’s  
216 ability to co-activate user-defined groups of neurons, selected based on their spatial or functional  
217 properties, while simultaneously recording neural activity from several downstream areas. We could  
218 identify individual downstream neurons that displayed time-locked excitatory or inhibitory responses  
219 hundreds or even thousands of microns away. This demonstrates that one can use this new technology  
220 to probe how both local and long-range functional interactions relate to specific neuronal computations  
221 all within the same experiment.

222

223 We developed the mesoscale read/write platform based on a commercially available 2p mesoscope  
224 (Thorlabs) that is a widely used mesoscope platform (Fahey 2019, Froudarakis 2020, Orlova 2021,  
225 Kanamori 2022, Pandey 2022) and that has enabled a number of other recent technological advances (Lu  
226 2020, Demas 2021, Tsyboulski 2018). We expect that adapting a commercially available system will  
227 facilitate the adoption of the technology across both individual labs and new neurotechnology platforms.  
228 In the current design, the holographic FOV is limited by the SLM accessible FOV which, given the system’s  
229 current magnification is in the millimetric range. Extending the holographic FOV to the entire mesoscale  
230 nominal FOV of the objective can be achieved by serially combining two conjugated SLMs, combining one  
231 SLM and one galvanometer mirror (Sun 2019), or spatially tiling multiple SLMs (Marshel 2019, Yang 2015),  
232 albeit at the cost of increased setup complexity. Nevertheless, the current configuration is sufficient to  
233 answer many fundamental outstanding questions in cortical function.

234

235 One recent study investigated inter-areal communication using a conventional two-photon microscope  
236 by imaging across the boundary of two contiguous cortical regions (Rowland 2021). The mesoscale  
237 platform presented here allows access to up to up to 25-fold more cortical surface (albeit at lower frame  
238 rates or lower spatial sampling). This much larger FOV encompasses many more cortical areas, more

239 coverage of feature-space within selected areas and the ability to study non-contiguous areas that are  
240 more than 1mm apart.

241  
242 While there is substantial work detailing how individual cortical areas represent and encode information,  
243 how neural representations are transformed across cortical areas remains elusive. Most studies  
244 addressing cortico-cortical communication combined multi-site electrode recordings with correlative  
245 analyses (Bressler 2011, Semedo 2019), or electrical or one-photon optogenetic stimulation. However,  
246 electrical microstimulation provides limited spatial control and often (and perhaps preferentially)  
247 activates axons of passage (Histed 2009). One-photon optogenetic stimulation has cell-type specific  
248 control but cannot readily activate functionally defined subsets of neurons (such as neurons with the same  
249 feature preference). Neither stimulation approach can recreate precise spatiotemporal patterns of  
250 activity, nor can they drive different user-defined firing rates into different neurons to recreate specific  
251 population activity vectors that might preferentially drive cortico-cortical communication (Semedo 2019).  
252 2p holographic optogenetics can achieve these goals (Bounds 2017, Mardinly 2018), and this new 2p  
253 holographic mesoscope can implement these perturbations while simultaneously measuring both local  
254 and downstream neural activity. Thus, 2p mesoscale holography is set up to experimentally test major  
255 hypotheses and theories of interareal communication, such as how cortico-cortical feedback implements  
256 generative models of the external world such as in the framework of predictive coding (Rao and Ballard  
257 1999, Markov and Kennedy 2013, Hertag and Clopath 2022). The 3D capability of the mesoscale  
258 read/write platform both in photostimulation (3D-SHOT) and recording (3D remote focusing) can further  
259 allow the user to test the role of different cortical layers in these models (Bastos 2012).

260  
261 Previously, we showed that photostimulation with 3D-SHOT and potent and fast optogenetic proteins  
262 enables millisecond-precise recreation of neural activity sequences across large ensembles of neurons  
263 (Sridharan, 2022). The 2p mesoscope we developed should have similar capabilities since it also employs  
264 3D-SHOT, although this is difficult to validate directly with in-vivo electrophysiology due to the bulky size  
265 of the objective. Several prominent theories of cortico-cortical communication, and inter-areal  
266 communication more generally, depend on the synchrony and/or oscillatory timing of activity in the  
267 sender and receiver area (Bastos 2015). We expect that this 2p holographic mesoscope should be capable  
268 of generating precise temporal sequences of neural activity in one area while monitoring the net impacts  
269 downstream. If so, it should be possible to ask directly how synchrony or oscillatory coherence facilitate  
270 communication, potentially in different frequency bands, between hierarchically organized brain areas.

271  
272 The 2p holographic mesoscope could also guide the design of more effective brain-machine interfaces  
273 (BMIs, Ersaro 2023). Signal transmission across areas can be iteratively optimized with single-cell  
274 resolution and millisecond precision by identifying and testing optimal communication subspaces for  
275 signal flow (Semedo, 2019) and/or dynamically adjusting spiking coordination. Obtaining access to  
276 intermediate stages of processing between the perturbed population activity and behavioral output  
277 should help optimize the photostimulation patterns that can maximize the fidelity of robotic limb control.  
278 In the context of limb neuroprosthetics (Lebedev and Nicolelis, 2006), mesoscale 2P holography could  
279 further incorporate fine tactile and proprioceptive-like feedback signals into the BMI that could make  
280 prostheses seamlessly fit as a natural limb extension.

281  
282 Finally, the large accessible FOV of the mesoscope will help scale two-photon optogenetics to species with  
283 larger brains such as primates. It can also enable new experimental paradigms in species smaller than the  
284 mouse, such as larval zebrafish, where one could perform targeted photostimulation in the central  
285 nervous system (CNS) while recording from both the CNS and peripheral organs. It could even allow photo-  
286 stimulation and recording from multiple small animals simultaneously, such as flies or worms, engaged in

287 social behaviors. Overall, we expect mesoscale two-photon holographic optogenetics to become a key  
288 technology in systems neuroscience because it can establish whole new classes of perturbative  
289 experiments to motivate and test previously untestable theories of brain function.

290  
291

## 292 **Acknowledgements**

293 We thank Paulo Chaves (Thorlabs), Stephen Prieur (Thorlabs) and Nikhil Bhatla for technical assistance.  
294 We thank the members of the Adesnik lab and Eirini Papagiakoumou for comments and discussions.  
295 This work was funded by NIH grants R01NS128772, UF1NS107574, and R01MH117824. H.A. is a Chan  
296 Zuckerberg Biohub Investigator.

297

## 298 **Author contributions**

299 L.A. and H.A. conceived of the project. L.A. designed and built the 2p holographic system with assistance  
300 from Thorlabs. L.A. and U.K.J. characterized the system. L.A., H.S. and U.K.J. performed experiments. M.O  
301 contributed software. L.A. and H.A. wrote the paper with assistance from H.S. and U.K.J.

302

## 303 **References**

304

- 305 Adesnik, H., & Abdeladim, L. (2021). Probing neural codes with two-photon holographic  
306 optogenetics. *Nature neuroscience*, *24*(10), 1356-1366.
- 307 Akturk, S., Gu, X., Kimmel, M., & Trebino, R. (2006). Extremely simple single-prism ultrashort-pulse  
308 compressor. *Optics express*, *14*(21), 10101-10108.
- 309 Bastos, A. M., Usrey, W. M., Adams, R. A., Mangun, G. R., Fries, P., & Friston, K. J. (2012). Canonical  
310 microcircuits for predictive coding. *Neuron*, *76*(4), 695-711.
- 311 Bastos, A. M., Vezoli, J., & Fries, P. (2015). Communication through coherence with inter-areal  
312 delays. *Current opinion in neurobiology*, *31*, 173-180.
- 313 Botcherby, E. J., Juškaitis, R., Booth, M. J., & Wilson, T. (2008). An optical technique for remote focusing  
314 in microscopy. *Optics Communications*, *281*(4), 880-887.
- 315 Bounds, H. A., Sadahiro, M., Hendricks, W. D., Gajowa, M., Oldenburg, I. A., Gopakumar, K., ... & Adesnik,  
316 H. (2021). Multifunctional Cre-dependent transgenic mice for high-precision all-optical interrogation of  
317 neural circuits. *bioRxiv*.
- 318 Bressler, S. L., & Seth, A. K. (2011). Wiener–Granger causality: a well established  
319 methodology. *Neuroimage*, *58*(2), 323-329.
- 320 Buetfering, C., Zhang, Z., Pitsiani, M., Smallridge, J., Boven, E., McElligott, S., & Häusser, M. (2022).  
321 Behaviorally relevant decision coding in primary somatosensory cortex neurons. *Nature*  
322 *neuroscience*, *25*(9), 1225-1236.
- 323 Carrillo-Reid, L., Yang, W., Bando, Y., Peterka, D. S., & Yuste, R. (2016). Imprinting and recalling cortical  
324 ensembles. *Science*, *353*(6300), 691-694.
- 325 Chettih, S. N., & Harvey, C. D. (2019). Single-neuron perturbations reveal feature-specific competition in  
326 V1. *Nature*, *567*(7748), 334-340.
- 327 Daie, K., Svoboda, K., & Druckmann, S. (2021). Targeted photostimulation uncovers circuit motifs  
328 supporting short-term memory. *Nature neuroscience*, *24*(2), 259-265.
- 329 Dagleish, H. W., Russell, L. E., Packer, A. M., Roth, A., Gauld, O. M., Greenstreet, F., ... & Häusser, M.  
330 (2020). How many neurons are sufficient for perception of cortical activity?. *Elife*, *9*, e58889.
- 331 Demas, J., Manley, J., Tejera, F., Barber, K., Kim, H., Traub, F. M., ... & Vaziri, A. (2021). High-speed,  
332 cortex-wide volumetric recording of neuroactivity at cellular resolution using light beads microscopy. *Nature*  
333 *Methods*, *18*(9), 1103-1111.
- 334 Ersaro, N. T., Yalcin, C., & Muller, R. (2023). The future of brain–machine interfaces is optical. *Nature*  
335 *Electronics*, 1-3.
- 336 Fahey, P. G., Muhammad, T., Smith, C., Froudarakis, E., Cobos, E., Fu, J., ... & Tolia, A. S. (2019). A  
337 global map of orientation tuning in mouse visual cortex. *BioRxiv*, 745323.

338 Froudarakis, E., Cohen, U., Diamantaki, M., Walker, E. Y., Reimer, J., Berens, P., ... & Tolias, A. S. (2020).  
339 Object manifold geometry across the mouse cortical visual hierarchy. *BioRxiv*, 2020-08.  
340 Garrett, M. E., Nauhaus, I., Marshel, J. H., & Callaway, E. M. (2014). Topography and areal organization  
341 of mouse visual cortex. *Journal of Neuroscience*, 34(37), 12587-12600.  
342 Hertäg, L., & Clopath, C. (2022). Prediction-error neurons in circuits with multiple neuron types: Formation,  
343 refinement, and functional implications. *Proceedings of the National Academy of Sciences*, 119(13),  
344 e2115699119.  
345 Histed, M. H., Bonin, V., & Reid, R. C. (2009). Direct activation of sparse, distributed populations of cortical  
346 neurons by electrical microstimulation. *Neuron*, 63(4), 508-522.  
347 Juavinett, A. L., Nauhaus, I., Garrett, M. E., Zhuang, J., & Callaway, E. M. (2017). Automated identification  
348 of mouse visual areas with intrinsic signal imaging. *Nature protocols*, 12(1), 32-43.  
349 Kanamori, T., & Mrsic-Flogel, T. D. (2022). Independent response modulation of visual cortical neurons by  
350 attentional and behavioral states. *Neuron*, 110(23), 3907-3918.  
351 Kim, T. H., & Schnitzer, M. J. (2022). Fluorescence imaging of large-scale neural ensemble  
352 dynamics. *Cell*, 185(1), 9-41.  
353 Lebedev, M. A., & Nicolelis, M. A. (2006). Brain-machine interfaces: past, present and future. *TRENDS in*  
354 *Neurosciences*, 29(9), 536-546.  
355 Lu, R., Liang, Y., Meng, G., Zhou, P., Svoboda, K., Paninski, L., & Ji, N. (2020). Rapid mesoscale volumetric  
356 imaging of neural activity with synaptic resolution. *Nature methods*, 17(3), 291-294.  
357 Machado, T. A., Kauvar, I. V., & Deisseroth, K. (2022). Multiregion neuronal activity: the forest and the  
358 trees. *Nature Reviews Neuroscience*, 23(11), 683-704.  
359 Mardinly, A. R., Oldenburg, I. A., Pégard, N. C., Sridharan, S., Lyall, E. H., Chesnov, K., ... & Adesnik, H.  
360 (2018). Precise multimodal optical control of neural ensemble activity. *Nature neuroscience*, 21(6), 881-  
361 893.  
362 Markov, N. T., & Kennedy, H. (2013). The importance of being hierarchical. *Current opinion in*  
363 *neurobiology*, 23(2), 187-194.  
364 Marshel, J. H., Garrett, M. E., Nauhaus, I., & Callaway, E. M. (2011). Functional specialization of seven  
365 mouse visual cortical areas. *Neuron*, 72(6), 1040-1054.  
366 Marshel, J. H., Kim, Y. S., Machado, T. A., Quirin, S., Benson, B., Kadmon, J., ... & Deisseroth, K. (2019).  
367 Cortical layer-specific critical dynamics triggering perception. *Science*, 365(6453), eaaw5202.  
368 Ohki, K., & Reid, R. C. (2007). Specificity and randomness in the visual cortex. *Current opinion in*  
369 *neurobiology*, 17(4), 401-407.  
370 Oldenburg, I. A., Hendricks, W. D., Handy, G., Shamardani, K., Bounds, H. A., Doiron, B., & Adesnik, H.  
371 (2022). The logic of recurrent circuits in the primary visual cortex. *bioRxiv*, 2022-09.  
372 Orlova, N., Najafi, F., Tsyboulski, D., Seid, S., Kivikas, S., Kato, I., ... & Lecoq, J. (2020). Multiplane  
373 Mesoscope reveals distinct cortical interactions following expectation violations. *bioRxiv*, 2020-10.  
374 Ota, K., Uwamori, H., Ode, T., & Murayama, M. (2022). Breaking trade-offs: Development of fast, high-  
375 resolution, wide-field two-photon microscopes to reveal the computational principles of the  
376 brain. *Neuroscience Research*, 179, 3-14.  
377 Pachitariu, M., Stringer, C., Schröder, S., Dipoppa, M., Rossi, L. F., Carandini, M., & Harris, K. D. (2016).  
378 Suite2p: beyond 10,000 neurons with standard two-photon microscopy. *BioRxiv*, 061507.  
379 Packer, A. M., Peterka, D. S., Hirtz, J. J., Prakash, R., Deisseroth, K., & Yuste, R. (2012). Two-photon  
380 optogenetics of dendritic spines and neural circuits. *Nature methods*, 9(12), 1202-1205.  
381 Pandey, B., Pachitariu, M., Brunton, B. W., & Harris, K. D. (2022). Structured random receptive fields enable  
382 informative sensory encodings. *PLoS Computational Biology*, 18(10), e1010484.  
383 Papagiakoumou, E., Ronzitti, E., & Emiliani, V. (2020). Scanless two-photon excitation with temporal  
384 focusing. *Nature Methods*, 17(6), 571-581.  
385 Pégard, N. C., Mardinly, A. R., Oldenburg, I. A., Sridharan, S., Waller, L., & Adesnik, H. (2017). Three-  
386 dimensional scanless holographic optogenetics with temporal focusing (3D-SHOT). *Nature*  
387 *communications*, 8(1), 1228.  
388 Rao, R. P., & Ballard, D. H. (1999). Predictive coding in the visual cortex: a functional interpretation of some  
389 extra-classical receptive-field effects. *Nature neuroscience*, 2(1), 79-87.  
390 Ronzitti, E., Ventalon, C., Canepari, M., Forget, B. C., Papagiakoumou, E., & Emiliani, V. (2017). Recent  
391 advances in patterned photostimulation for optogenetics. *Journal of Optics*, 19(11), 113001.



392 Rowland, J. M., van der Plas, T. L., Loidolt, M., Lees, R. M., Keeling, J., Dehning, J., ... & Packer, A. M.  
393 (2021). Perception and propagation of activity through the cortical hierarchy is determined by neural  
394 variability. *bioRxiv*, 2021-12.

395 Rumyantsev, O. I., Lecoq, J. A., Hernandez, O., Zhang, Y., Savall, J., Chrapkiewicz, R., ... & Schnitzer, M.  
396 J. (2020). Fundamental bounds on the fidelity of sensory cortical coding. *Nature*, *580*(7801), 100-105.

397 Russell, L. E., Yang, Z., Tan, P. L., Fişek, M., Packer, A. M., Dalgleish, H. W., ... & Häusser, M. (2019). The  
398 influence of visual cortex on perception is modulated by behavioural state. *bioRxiv*, 706010.

399 Semedo, J. D., Zandvakili, A., Machens, C. K., Byron, M. Y., & Kohn, A. (2019). Cortical areas interact  
400 through a communication subspace. *Neuron*, *102*(1), 249-259.

401 Sofroniew, N. J., Flickinger, D., King, J., & Svoboda, K. (2016). A large field of view two-photon mesoscope  
402 with subcellular resolution for in vivo imaging. *elife*, *5*, e14472.

403 Sun, S., Zhang, G., Cheng, Z., Gan, W., & Cui, M. (2019). Large-scale femtosecond holography for near  
404 simultaneous optogenetic neural modulation. *Optics express*, *27*(22), 32228-32234.

405 Stirman, J. N., Smith, I. T., Kudenov, M. W., & Smith, S. L. (2016). Wide field-of-view, multi-region, two-  
406 photon imaging of neuronal activity in the mammalian brain. *Nature biotechnology*, *34*(8), 857-862.

407 Sridharan, S., Gajowa, M. A., Ogando, M. B., Jagadisan, U. K., Abdeladim, L., Sadahiro, M., ... & Adesnik,  
408 H. (2022). High-performance microbial opsins for spatially and temporally precise perturbations of large  
409 neuronal networks. *Neuron*, *110*(7), 1139-1155.

410 Tsyboulski, D., Orlova, N., Griffin, F., Seid, S., Lecoq, J., & Saggau, P. (2018). Remote focusing system for  
411 simultaneous dual-plane mesoscopic multiphoton imaging. *BioRxiv*, 503052

412 Yang, S. J., Allen, W. E., Kauvar, I., Andalman, A. S., Young, N. P., Kim, C. K., ... & Deisseroth, K. (2015).  
413 Extended field-of-view and increased-signal 3D holographic illumination with time-division  
414 multiplexing. *Optics express*, *23*(25), 32573-32581.

415 Yu, C. H., Stirman, J. N., Yu, Y., Hira, R., & Smith, S. L. (2021). Diesel2p mesoscope with dual independent  
416 scan engines for flexible capture of dynamics in distributed neural circuitry. *Nature communications*, *12*(1),  
417 6639.

418 Zhuang, J., Ng, L., Williams, D., Valley, M., Li, Y., Garrett, M., & Waters, J. (2017). An extended retinotopic  
419 map of mouse cortex. *elife*, *6*, e18372.

420

421

## 422 **Methods**

### 423 *Animals*

424 All experiments on animals were conducted with approval of the Animal Care and Use Committee of the  
425 University of California, Berkeley. All experiments were performed in mice of both sexes, aged two  
426 months and older. Two transgenic mouse lines were used: either Ai203 transgenic lines (Bounds et al)  
427 crossed in-house with Vglut1-Cre mice, or triple transgenic mice emx1-Cre;CaMK2-tTA;tetO-GCaMP6s  
428 obtained by crossing the corresponding lines in-house (JAX stock# 005628, Jax stock# 003010 and Jax  
429 stock# 024742). Mice were housed in groups of five or fewer in a reverse light: dark cycle of 12:12 hours.  
430 Experiments were conducted during the dark phase.

### 431 *Surgery*

432 Mice were anesthetized with isoflurane (2%) and given buprenorphine as an analgesic (0.05mg/kg) and  
433 dexamethasone (2mg/kg) to reduce brain swelling. Mice were then placed in a stereotaxic frame (Kopf)  
434 over a heating pad. The scalp was removed, the fascia pushed to the sides, and the skull lightly scratched  
435 for better cement adhesion. A 4 or 5mm craniotomy centered around V1 was made using a biopsy punch  
436 (Robbins Instruments) and/or a dental drill (Freedom). Bleeding was controlled with cold phosphate-  
437 buffered saline and Gelfoam (Pfizer Inc.) For mice that required viral injection (triple transgenics), the virus  
438 preparation (AAV9-CAG.DIO.Chrome2s-FLAG-ST.P2A.H2B.mRuby3.WPRE.SV40) was injected using a  
439 beveled glass pipette at 4-5 locations across visual cortex. A cranial window, made of 7 mm and 5 mm  
440 diameter glass coverslips or 6 mm and 4 mm diameter glass coverslips, for 5- and 4-mm craniotomies  
441 respectively, was then placed onto the craniotomy and held in place with Metabond (C&B). Finally, a  
442 titanium headplate was fixed to the skull with Metabond (C&B) and Ortho Jet (Lang). All craniotomies  
443 were performed on the left hemisphere of the mouse brain. Animals were allowed to recover in a heated  
444 recovery cage before being returned to their home cage.

### 445 *2P-RAM mesoscope with a temporally-focused holographic path*

446 The mesoscale read/write platform was custom-built around a 2P random-access fluorescence  
447 mesoscope previously described in detail (Sofroniew 2016) and now commercialized by Thorlabs Inc. The  
448 system had a nominal 5mm FOV accessed through a 0.6 NA objective that can be rapidly and flexibly  
449 scanned-across with a set of four conjugated scanners, one 12kHz resonant scanner and three large-angle  
450 galvanometers. The system was also equipped with a voice-coil remote-focusing module (Botcherby 2008)  
451 for 3D multi-plane imaging. In addition, the mesoscope was built on a vertical breadboard and the whole  
452 system was motorized in 4 dimensions (X, Y, Z translation and one axis of rotation) to provide maximal  
453 flexibility for the user. Since the microscope moved with respect to the incoming laser beam, the beam  
454 was injected through a six-stage periscope for alignment invariance.

455 The 2P mesoscale imaging path relied on a Ti:sapphire laser (Mai Tai, Spectra Physics) used at 920 nm for  
456 calcium imaging. External power control was achieved through a Pockels cells (Conoptics, Inc). A prism-  
457 based group delay dispersion compensation module (Akturk 2006) was installed to compensate for  
458 dispersion introduced by the mesoscope imaging path optics (estimated at about 25,000 fs<sup>2</sup>, Sofroniew  
459 2016). The 2P holographic path relied on a 1030 nm femtosecond fiber laser (Aeropulse 50, NKT  
460 Photonics) with internal power control.

461 The holographic path was built on a 33" × 24"" breadboard attached to the main mesoscope frame with  
462 three custom mounts (see Supplementary CAD, and Supplementary note 2). The holographic beam was  
463 merged with the imaging beam with a 1000 nm cutoff dichroic (DMSP1000R, Thorlabs) and rigorously co-

464 aligned with the imaging beam through the system's periscope to maintain alignment invariance with  
465 translation. The beam was then injected onto the 3D-SHOT optical path (see Supplementary partlist and  
466 supplementary CAD) with specific care to maintaining beam horizontality to achieve alignment invariance  
467 with rotation (see Supplementary note 2).

468 The imaging path hardware was controlled with ScanImage software (Vidrio Technologies, LLC). Custom  
469 Matlab code was used for control of the photostimulation path hardware, synchronization with imaging  
470 and control of the visual stimulation.

#### 471 *Hologram characterization and system calibration*

472 To characterize the generated holograms, 2P fluorescence was recorded from a thinly coated fluorescent  
473 slide with a substage objective ( $\times 4$  Zeiss) coupled to a camera (Basler) with a  $f=125$  mm achromatic  
474 doublet which provided a  $1.3 \times 1.3$  mm characterization FOV. For successful multiphoton optogenetics  
475 experiments, precise co-alignment of the imaging and the photostimulation beams is required. To achieve  
476 this, hundreds of holograms were generated in 3D and any arbitrary curvature or inhomogeneity on the  
477 imaging remote-focusing planes or the SLM planes was taken into account in the computation of the  
478 hologram to real space transform matrix (Supp Fig. 2), in a fully automated procedure (Oldenburg 2022).  
479 The holographic FOV was then remapped onto the entire mesoscopic FOV so that photostimulation  
480 targets could be flexibly selected in any imaging ROI configuration. The recorded holograms were also  
481 used as a reference to correct for diffraction efficiency fall-off and deliver homogeneous powers across  
482 the field-of-view *in-vivo*. To characterize hologram position invariance with translation and rotation, 2D  
483 point-cloud holograms were generated to "burn holes" i.e photobleach a fluorescent slide. The 2P  
484 fluorescence signal on the slide was then recorded with the mesoscope photomultiplier tubes (PMTs).

#### 485 *Visual stimulation and retinotopy*

486 Visual stimuli were displayed on a  $2048 \times 1536$  Retina iPad LCD monitor (Adafruit Industries) placed 10  
487 cm from the right eye of the mouse and computed using Psychtoolbox-3 and custom MATLAB code. Visual  
488 stimuli were presented to map retinotopy and to identify functionally-defined ensembles. Otherwise, no  
489 visual stimulus was presented to the mouse during simultaneous imaging and photostimulation  
490 experiments.

491 Retinotopy mapping was used primarily to identify visual cortical area boundaries. To map retinotopy, we  
492 adapted the procedure used in Marshel et al., 2011 and Zhuang et al., 2017 for the 2-photon mesoscope.  
493 Briefly, we imaged a  $3.1 \times 3.1$  mm FOV 100-200  $\mu$ m below the dura at 3Hz when mice were viewing noise  
494 bars drifting in the horizontal or vertical directions. The bars were 10' in width and spanned the vertical  
495 or horizontal extents of the screen respectively. The noise was drawn from a gaussian distribution with  
496 spatial frequency 0.03 cycles/deg and temporal frequency 3 cycles/deg. Each type of bar swept the screen  
497 30 times with a period of 9s, for a total stimulation duration of 10 minutes. We smoothed the recorded  
498 2-photon calcium frames with a 4-8 pixel square filter and downsampled them by 4-8x. For each pixel in  
499 the reduced image, we computed the preferred azimuth and elevation by identifying the average  
500 horizontal and vertical positions of the bar at which the pixel's response was maximal. This generated  
501 azimuth and elevation preference maps for the full FOV. We then computed the sign of the gradients  
502 between the two maps to generate a visual field sign map (Sereno, et al., 1994), and used sign flips in this  
503 map to identify area boundaries as outlined in (Garrett et al., 2014, Juavinett et al., 2017).

#### 504 *In vivo mesoscale two-photon imaging and photostimulation*

505 For *in vivo* 2-photon mesoscale calcium imaging *in vivo*, mice were head-fixed and allowed to run on a  
506 freely moving circular treadmill. Mesoscale Imaging ROIs were set to  $2.4 \times 2.4$  mm to  $3.6$  mm  $\times$   $3.6$  mm

507 FOVs with recording rates between 3 and 5Hz. The imaging laser was set at 920 nm. Opsin expressing  
508 cells were automatically segmented online based on either the green channel signal (Ai203 mice) or the  
509 red nuclear mRuby2 (virally injected mice).

#### 510 *Optical physiological point-spread function measurements*

511 To estimate the PPSF, we first identified photoactivatable neurons near the center of the holography FOV  
512 and selected 8 targets for multi-target stimulation. We generated 50 8-target holograms around and  
513 including the central holograms, 17 for the lateral PPSF and 33 for the axial PPSF. For the lateral PPSF,  
514 each hologram was offset in the [-40,40] um range with 5um increments along the x-axis. For the axial  
515 PPSF, each hologram was offset in the [-80,80] um range with 5 um increments along the z-axis. Each  
516 hologram was illuminated with 5 x 5ms pulses @ 30Hz and 25mW/target, with 10 repeats per hologram.  
517 The responses of the targeted neurons were averaged over each condition's repeats to compute the PPSF.

#### 518 *Multi-area targeting*

519 For the multi-area holography demonstration in Figure 2f, we first identified area boundaries using  
520 retinotopy, and picked 4 visual cortical areas (V1, PM, RL, and LM) for same-session sequential targeting.  
521 For each area, we moved the objective along both lateral axes until the holographic FOV (fixed with  
522 respect to the objective) was positioned over the center of the area. We then adjusted the 2P-RAM scan  
523 fields to image a contiguous 3.1 x 3.1 mm area covering a fixed portion of the window using the  
524 vasculature as fiduciary markers. As a result, at the beginning of each area's experiment, the imaging FOV  
525 was identical, but the holography FOV covered a different cortical area. In each experiment, we identified  
526 10-15 of the most photoactivatable neurons with sequential single-neuron targeting. We then targeted  
527 these neurons (V1-13, PM-12, RL-11, LM-12 neurons) in each area using a multi-target hologram, driving  
528 them with a single 250ms pulse and 80 mW per target.

#### 529 *Holographic Stimulation of Functionally Defined Ensembles*

530  
531 For co-tuned ensemble stimulation experiments presented in Figure 3, we used Vglut1-Cre;Ai203 mice  
532 (Ai203 refers to a transgenic line expressing the transgene TITL-st-ChroME-GCaMP7s-ICL-nls-mRuby3-  
533 IRES2-tTA2; Bounds et al., 2022). We recorded 11 sessions from 2 female mice (5 and 6 sessions each  
534 mouse). The holographic FOV was placed over V1 (white rectangle in Figure 3a). The imaging FOV  
535 encompassed V1, LM, RL, AL, PM and AM (2400 X 2400 m2). The imaging and holographic FOV was fixed  
536 throughout each recording session.

537 To holographically stimulate neural ensembles defined by their visual response properties, each  
538 recording session consisted of 3 steps. In Step 1, we recorded visual responses of neurons in the FOV while  
539 the mouse viewed various images on the monitor. To gauge the orientation preference of each neuron,  
540 we presented static gratings in 4 different orientations (0, 45, 90, 135°), at a contrast of 0.75 and spatial  
541 frequency of 0.04 cycles per degree. Gray screen 'blank' trials, as well as static gratings in each orientation,  
542 was repeated 50 times, with randomized trial order. Each presentation, or trial, lasted for 1 s with 0 s  
543 inter-trial intervals. As such, the static grating block lasted 250 s (5 trial types X 50 repeats X 1s duration).

544 In the Step 2, we analyzed the 2p imaging data collected in Step 1 by running Suite2p on the  
545 computer where ScanImage was running. Before running Suite2p, we converted the ScanImage tif files  
546 into an h5 file as follows: 1) loading the ScanImage tif files; 2) cropping it into region corresponding to the  
547 holographic FOV; 3) keeping only the frames corresponding to the functional channel (e.g., every other  
548 frame if both red and green PMTs were recorded); and 4) saving as an h5 file. It was important to convert  
549 at least 5000 time points, because Suite2p identifies many more spurious ROIs with shorter recordings.

550 Next, we ran Suite2p on the cropped h5 file. Because there is insufficient time to manually curate the ROIs  
551 during the online analysis, we analyzed tuning curves for every ROI returned by the Suite2p.

552 In Step 3, we holographically stimulated neural ensembles defined in Step 2. Each target received  
553 50mW, and each stimulation consisted of 10 pulses of 10 ms duration at 16 Hz. In addition to the co-tuned  
554 ensemble stimulation at 4 orientations, 0-power 'blank' trials and mixed-tuned ensemble stimulation  
555 trials were interleaved (i.e., 6 trial types). Each trial type was repeated 20 times with an inter-trial interval  
556 of 5 s.

#### 557 *Holographic Stimulation of random multi-target ensembles*

558 For the targeted photostimulation experiment presented in Figure 4a-c, we used virally injected  
559 transgenic mice (EMX1-Cre;CaMK2-tTA;tetO-GCaMP6s injected with AAV9-CAG.DIO.ChroME2s-FLAG-  
560 ST.P2A.H2B.mRuby3.WPRE.SV40). The holographic FOV was placed over LM. The imaging FOV  
561 encompassed V1, LM, RL, PM and AM (2400 X 2400  $\mu\text{m}^2$ ). Stimulation consisted of long 250ms pulses, at  
562 zero power, P=30mW and P=50mW, with 200 trials per power condition to maximize detectability of long-  
563 range responses. P=30mW and P=50mW trials were averaged as the stimulation condition.

564 For the targeted photostimulation experiments presented in Figure 4d-g, we used Vglut1-  
565 Cre;Ai203 mice. We recorded 4 sessions from 2 female mice (n=2 sessions each). The holographic FOV  
566 was placed over LM. The imaging FOV encompassed V1, LM, RL, AL, A and AM (3000 X 1800  $\mu\text{m}^2$ ). Each  
567 target received 50mW, and each stimulation consisted of 10 pulses of 10 ms duration at 16 Hz. In each  
568 session, 4 distinct holograms were used in addition to a zero power condition, with 80 trials per condition.

#### 569 570 *Offline analysis of mesoscopic two-photon calcium data*

571 Motion correction and source extraction were done using Suite2p (Pachitariu, 2016), run through GPU for  
572 faster processing. Calcium sources were manually curated based on morphologically identifiable neurons.  
573 For downstream analysis, frames with stimulation laser artefacts were discarded and neuropil  
574 fluorescence was subtracted from the fluorescence traces using a 0.7 neuropil coefficient. Each cell's  
575 fluorescence trace was then z-scored (Figure 2) or the  $dF/F$  was computed prior to z-scoring (z-scored  
576  $dF/F$ ).  $dF/F$  was defined as  $(F-F_{\text{med}})/F_{\text{med}}$  where F is the neuropil corrected fluorescence trace and  $F_{\text{med}}$   
577 the median of the neuropil corrected fluorescence trace across all trials. A baseline of 2-5 frames before  
578 the stimulus onset was then subtracted for every trial (Figures 3,4). In long-range post-synaptic analyses  
579 (Figure 4), calcium traces were smoothed by a gaussian filter with size = 1. Photostimulation targets  
580 coordinates were remapped into the stitched mesoscale FOV. and assigned to the closest suite2P  
581 identified calcium source.

#### 582 *Decoding photostimuli pairs*

583 To discriminate between pairs of distinct photostimulation patterns, a gradient boosting decision tree  
584 algorithm was used. The classifier was trained on 70% of the trials (n=112 trials per pair labeled as either  
585 photostimulus 1 or photostimulus 2) and tested on the remaining trials (n = 48 trials). The decoding  
586 accuracy was defined as the number of correctly predicted trials over the total number of test trials. For  
587 each pair of photostimuli, the final reported decoding accuracy result was the average across 10  
588 independent draws (cross-validation). For the shuffled control decoding, the classifier was trained on  
589 randomly mislabeled trials and tested on the 30% held-out trials.

#### 590 *Statistics*

591 All statistical analyses were performed using Python or Matlab. The analyses performed were paired t-  
592 test, Wilcoxon sum-rank and Mann-Whitney U test and tests were two-sided unless stated otherwise. No  
593 statistical method was used to predetermine sample size. Trial randomization was used in all applicable  
594 experiments (Figures 2,3,4).

595

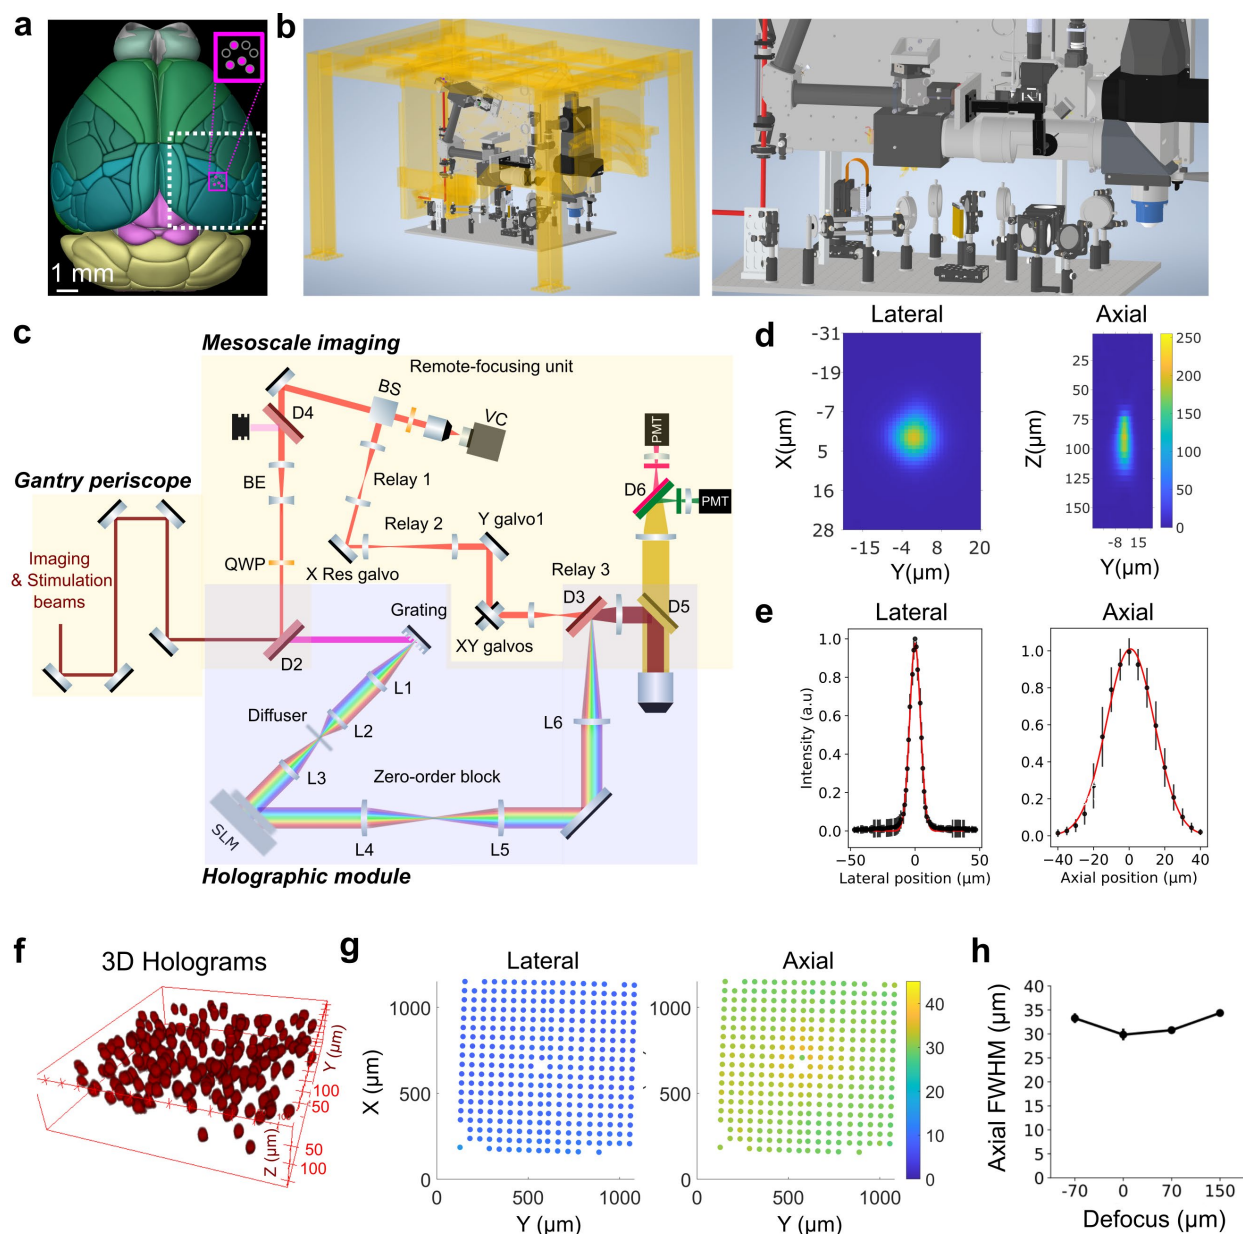

596

597 **Figure 1. A 2P-RAM mesoscope with temporally-focused 2P holographic photostimulation.** **a**) Schematic  
 598 dorsal view of the mouse brain with putative functional areas demarcated (Allen Brain Explorer). The  
 599 holographic mesoscope allows targeted photostimulation in a 1x1 mm FOV (magenta square) combined  
 600 with simultaneous mesoscale imaging across a nominal 5x5 mm imaging FOV (dotted white). **b**) Left: CAD  
 601 model of the holographic mesoscope platform. Right: blow up of the holographic module attached to the  
 602 main frame of the mesoscope. **c**) Simplified schematic of the optical path. QWP: quarter-wave plate, BE:  
 603 beam expander, Ln: achromatic doublet, Dn: dichroic mirror. See Supplementary Fig.1 for a more detailed  
 604 schematic. **d**) Example lateral and axial 2P fluorescence intensity profiles of a single, temporally focused  
 605 holographic illumination spot. **e**) Optical lateral and axial point-spread-functions (PSFs). Error bars:  
 606 standard error of the mean (S.E.M). Red curve: Gaussian fit, lateral full-width-half-maximum (FWHM) 9  
 607  $\mu\text{m}$ , axial FWHM: 32  $\mu\text{m}$ . **f**) Example point-cloud 3D holograms. **g**) 2D grid of single-spot holograms

608 showing the extent of the holographic FOV and the distribution of lateral and axial resolution across the  
609 FOV. h. Axial PSF as a function of digital Z-defocus.

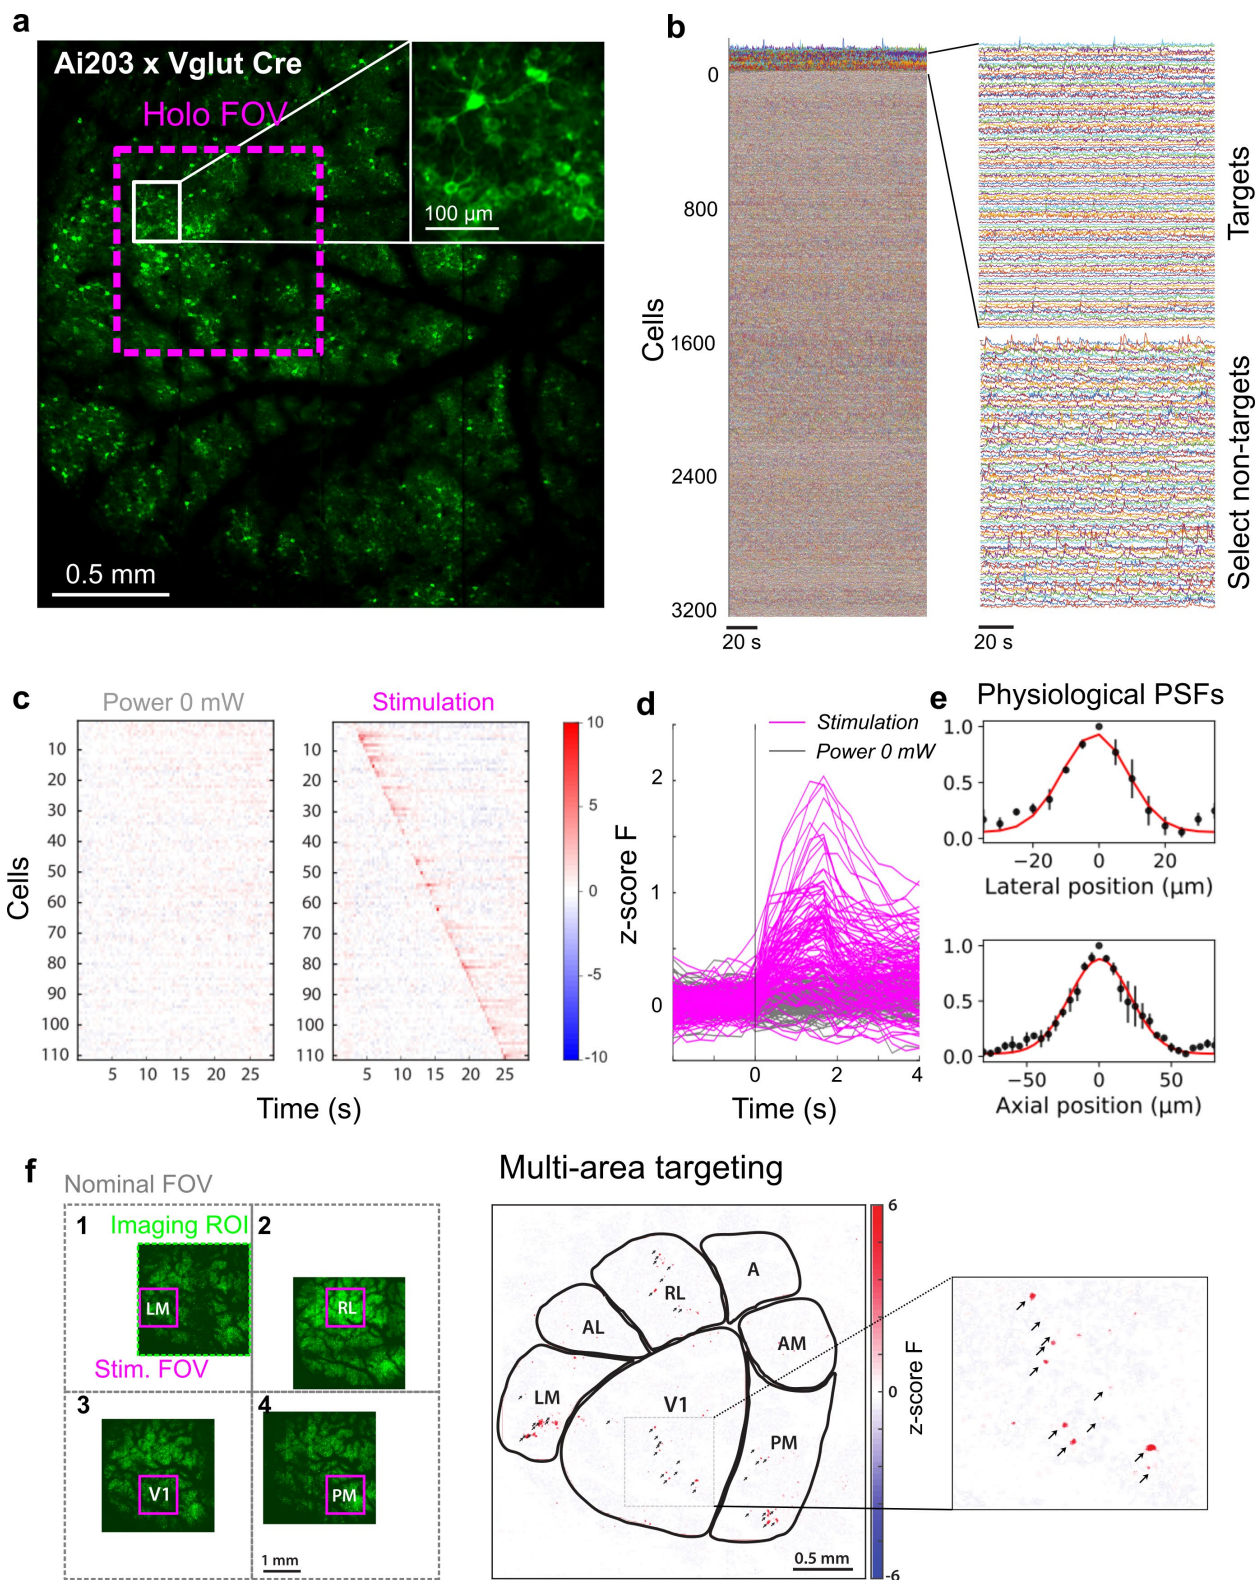

610



611 **Figure 2. Cellular resolution two-photon holographic optogenetics at the mesoscale.** **a)** A 2p mesoscale  
 612 image of widespread co-expression of GCaMP7s and ChroME over a large field-of-view (FOV) in an Vglut1-  
 613 Cre;Ai203 transgenic mouse. Magenta square indicates the accessible holographic FOV within an example  
 614 mesoscale imaging FOV of 2.4 mm × 2.4 mm recorded at 4.5Hz frame rate. **b)** Example calcium traces from  
 615 a set of photo-stimulation targets within the holographic FOV and thousands of traces from non-targets  
 616 recorded across the mesoscale FOV. **c)** Calcium responses of targeted cells during single-cell sequential  
 617 targeting on stimulation trials (right) vs. control trials without stimulation (left). **d)** Stimulus-aligned target  
 618 cell responses across the holographic FOV (n=111 cells) **e)** *In vivo* optically measured physiological point-  
 619 spread functions (n=3cells). Error bars: S.E.M. Red curve: Gaussian fit, lateral full-width-half-maximum  
 620 (FWHM) 23  $\mu$ m, axial FWHM: 49  $\mu$ m. **f)** Demonstration of sequential area mesoscale holographic  
 621 stimulation. Left: 4 example configurations to holographically target 4 different visual areas within the  
 622 same session and record from surrounding visual areas. Imaging ROIs were selected for a 4.5 Hz imaging  
 623 rate at 1 $\mu$ m/pixel. Center: Activation map of holographically targeted neurons in 4 visual areas (V1, PM,  
 624 RL and LM). Black arrows point to target locations. Right: Zoomed in inset of the activation map in V1.

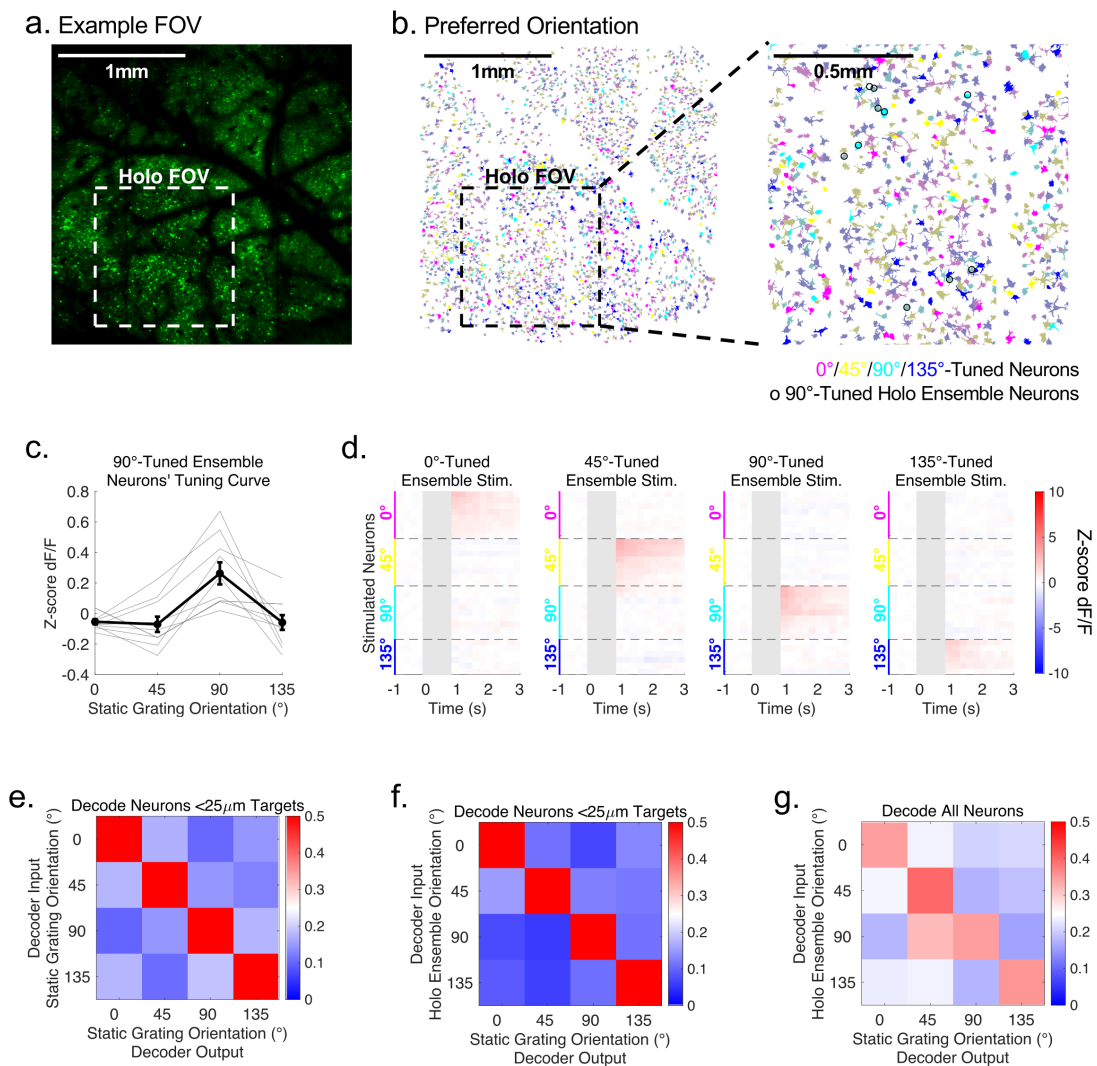

626

627 **Figure 3. Holographic stimulation of co-tuned ensembles emulates visually evoked activity.** **a)** Example  
628 imaging FOV used in this experiment ( $2.4 \times 2.4 \text{ mm}^2$ , Vglut1-Cre;Ai203 mouse). The holographic FOV was  
629 positioned over V1. **b)** Same FOV as **a**, with the cells color coded by their preferred orientation  
630 ( $0/45/90/135^\circ$  in magenta/yellow/cyan/blue, respectively). Significantly tuned cells are labelled with solid  
631 colors while other cells are grayed out ( $p < 0.05$  Wilcoxon rank-sum test for preferred vs orthogonal  
632 orientations). Right: enlarged image of the holographic FOV with thin circles indicating the holographic  
633 targets that were activated by the  $90^\circ$ -tuned ensemble stimulation. **c)** Orientation tuning curves of a group  
634 of neurons that were then co-activated as the  $90^\circ$ -tuned ensemble stimulation in **d**). **d)** Holographically  
635 evoked activity in a population of neurons that were grouped into four distinct orientation-specific  
636 ensembles. Imaging frames recorded during the holographic stimulation are grayed out due to the  
637 holographic stimulation artifact. **e)** Classification accuracy of a linear support vector machine (SVM)  
638 trained to classify visual response of 4 orientations, for neurons within  $25 \mu\text{m}$  of each target in holographic  
639 ensembles (average 77.7 neurons per session). 10-fold cross-validated decoding accuracy was  $0.557 \pm$   
640  $0.019$  mean  $\pm$  standard error mean (SEM) across  $N=11$  sessions ( $p = 9.77 \times 10^{-4}$  Wilcoxon signed-rank  
641 test compared to chance-performance of 0.25). **f)** Classification accuracy of the same SVM when probed  
642 with orientation-specific holographically evoked activity without any visual stimulus ( $0.696 \pm 0.043$  mean  
643  $\pm$  SEM,  $p = 9.77 \times 10^{-4}$  Wilcoxon signed-rank test across  $N=11$  sessions). Decoding accuracy was  
644 measured as the proportion of holography trials that were classified as the corresponding grating  
645 orientation. **g)** As in **f**) but when using Linear SVMs trained on all neurons in the FOV (average 1865  
646 neurons,  $0.360 \pm 0.026$  mean  $\pm$  SEM,  $p = 9.77 \times 10^{-4}$  Wilcoxon signed-rank test across  $N=11$  sessions).

647

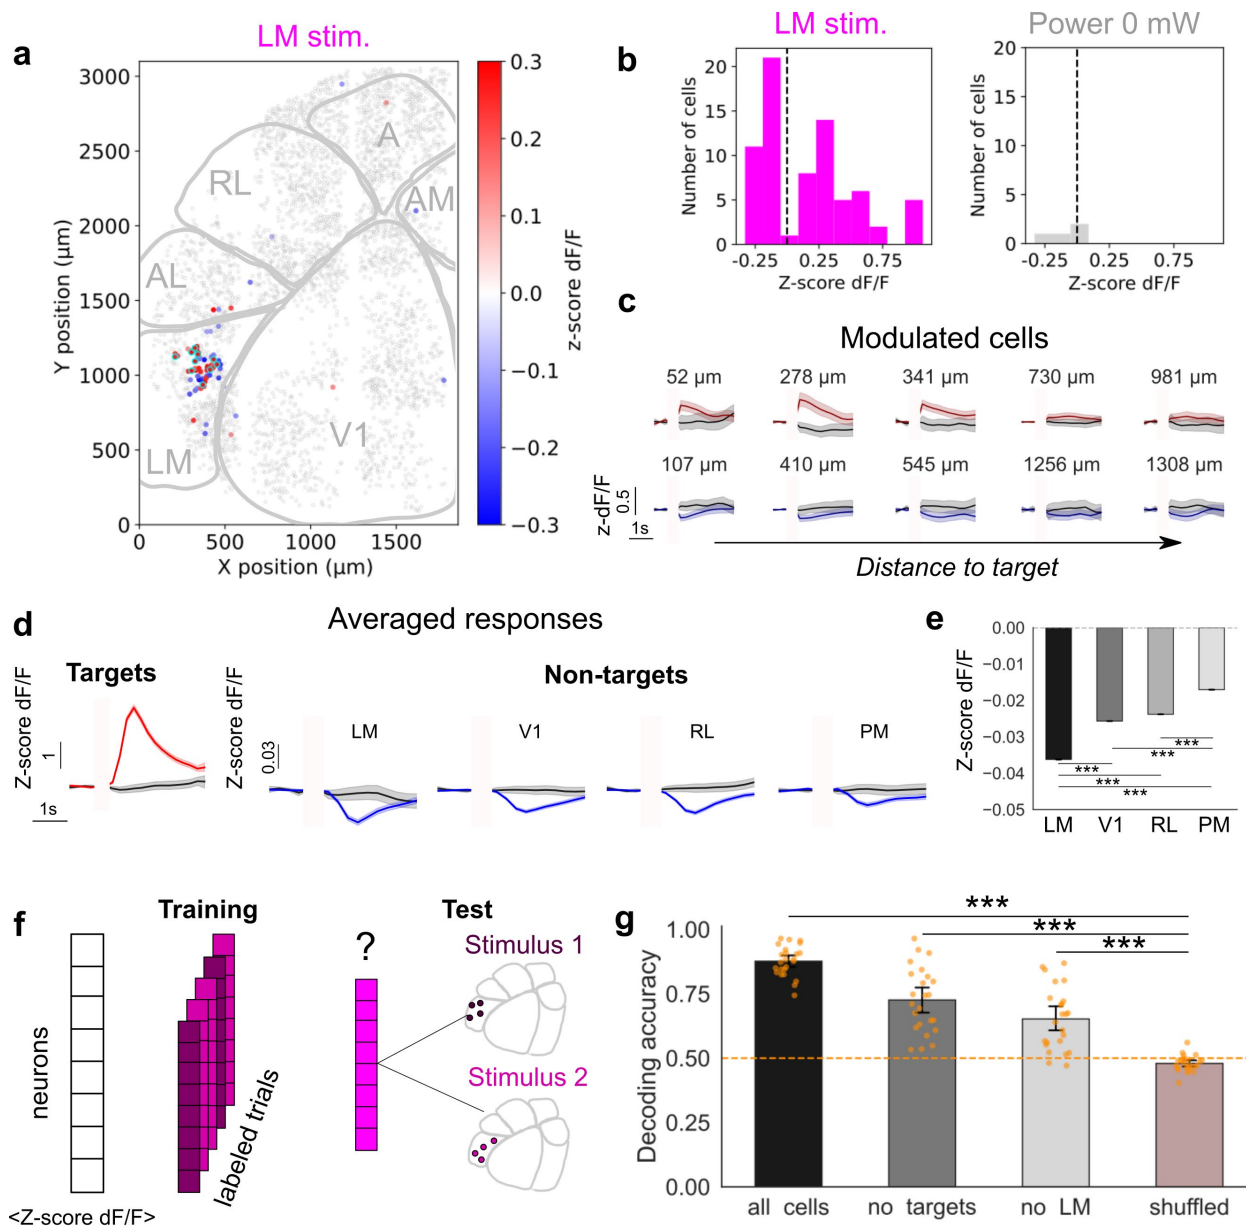

648  $\langle$ Z-score dF/F $\rangle$

649 **Figure 4. Mesoscale recording of long-range, corticocortical responses to holographic activation. a)** An  
650 example mesoscale holographic ‘influence’ map measured in response to activation of an ensemble of LM  
651 neurons. Significantly modulated cells are colored according to the amplitude of their calcium responses.  
652 Non-modulated cells are displayed in gray. Holographic targets are circled in cyan. **b)** Distribution of the  
653 amplitude of the post-stimulation calcium responses of significantly modulated cells compared to control  
654 trials with no stimulation. **c)** Example average calcium responses of individual modulated cells. Red/Blue:  
655 average response on stimulation trials (n=200 trials). Black: average response on control (no stimulation)  
656 trials (n=200 trials). **d-e)** Average calcium responses across neurons in four areas (n=4 sessions, 2 mice)  
657 during multi-target (3-20 cells) stimulation in LM. Red/Blue traces: average across stimulation trials (80  
658 trials  $\times$  4 sessions). Black traces: average across no-stimulation control trials. Mann-Whitney: LM/V1:  
659 3.53E-20, LM/RL: 4.18E-24, LM/PM: 4.63E-59, V1/RL: 0.11, V1/PM: 8.66E-22, RL/PM:1.94E-17. **f)**  
660 Schematic of a decoder trained to discriminate different holographically induced patterns of activity from

661 downstream responses. **g)** Decoding accuracy of a classifier trained to discriminate the holographically  
662 induced patterns in LM from different groups of non-targeted cells in the FOV. All cells: decoding from all  
663 neurons in the mesoscale FOV. No targets: decoding from all neurons except the targeted cells. No LM:  
664 decoding from all neurons outside area LM. Shuffled: decoding from all neurons outside area LM but with  
665 training set labels shuffled. The cross-validated decoding accuracy across  $N = 4$  sessions for all cells, no  
666 targets, no LM and shuffled categories was, respectively,  $0.88 \pm 0.01$ ,  $0.73 \pm 0.03$ ,  $0.65 \pm 0.02$  and  $0.48 \pm 0.01$   
667 (mean  $\pm$  SEM), the chance level being at 0.5. Wilcoxon signed-rank test across  $N = 4$  sessions: All cells/  
668 targets:  $4.89 \times 10^{-5}$ , all cells/ no LM:  $1.67 \times 10^{-6}$ , no targets/ no LM: 0.011, all cells/ shuffled:  $1.67 \times 10^{-7}$ , no  
669 targets/ shuffled:  $1.32 \times 10^{-9}$ , no LM/shuffled:  $5.96 \times 10^{-7}$ . All groups (all cells, no targets, no LM) show highly  
670 significant decoding performance (p-value  $< 0.001$ ) compared to the shuffled group.

671

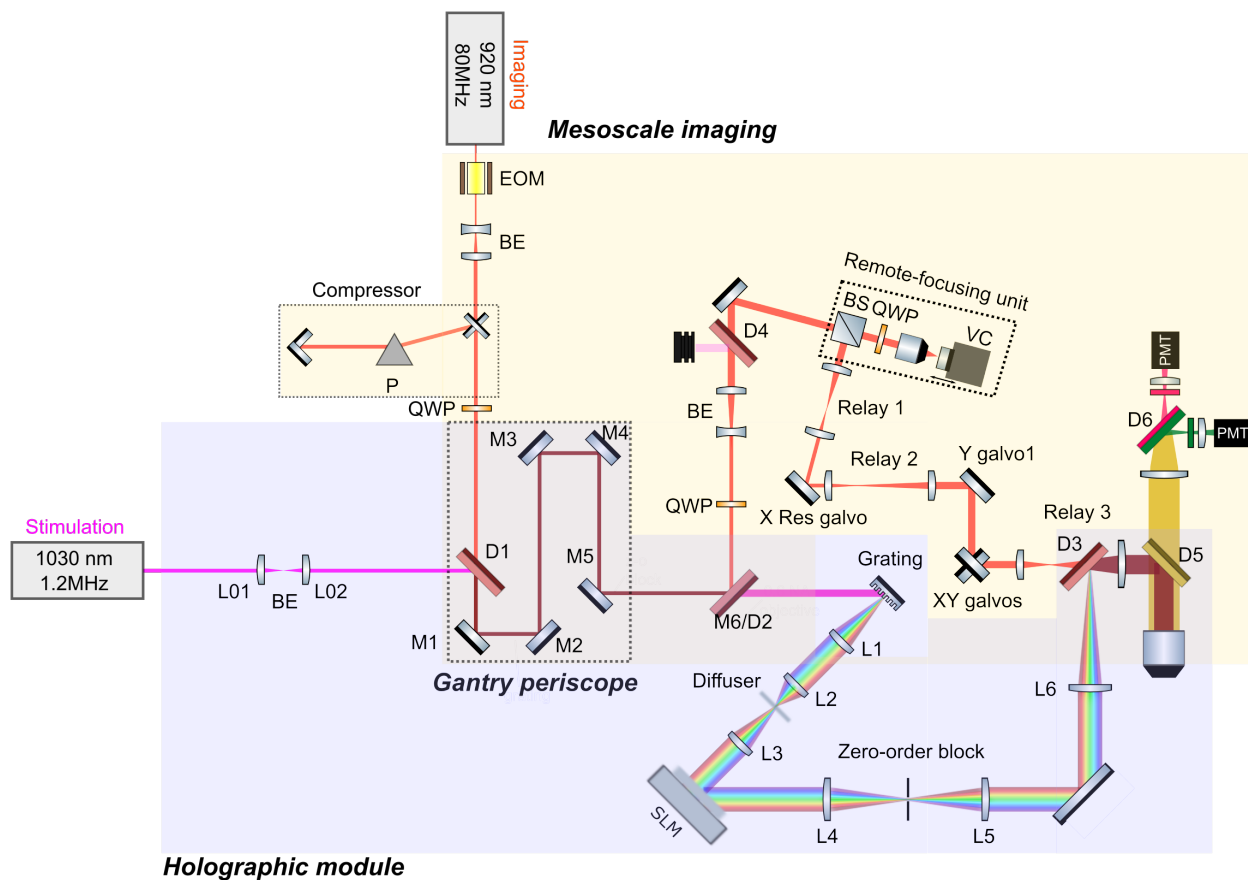

672

673 **Supplementary Figure 1. 2P holographic mesoscope optical setup.** EOM: electro-optic modulator, BE:  
674 beam expander, P: prism, QWP: quarter waveplate, Dn: dichroic mirror, BS: polarization beamsplitter, VC:  
675 voice coil, SLM: spatial light modulator. M6 mirror in the original mesoscope design has been replaced  
676 with the D2 dichroic.

677

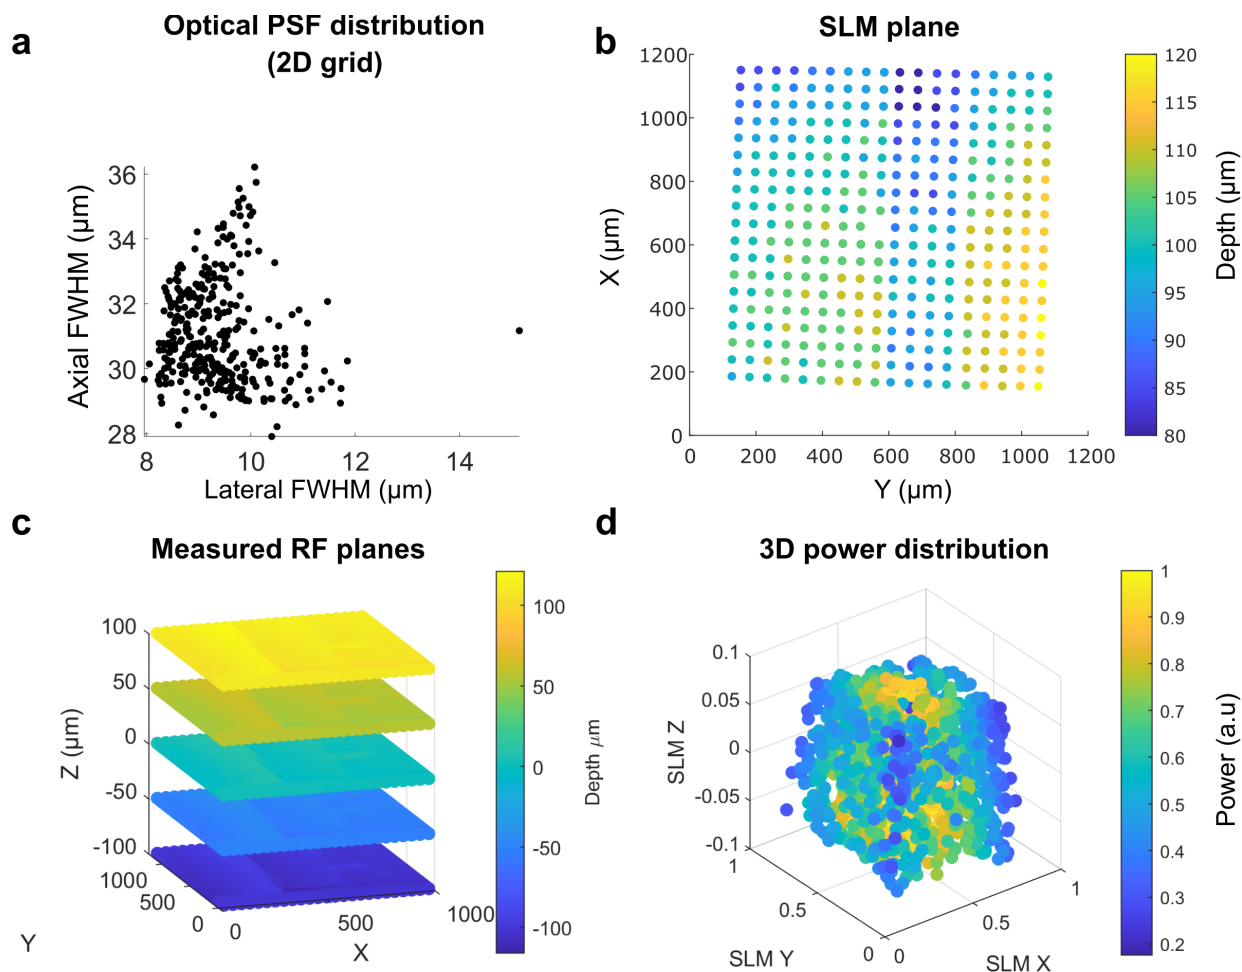

678

679 **Supplementary Figure 2. Optical characterization of the 2P holographic mesoscope.** **a)** Distribution of  
680 optical point-spread-functions of holograms arranged in a 2D grid across the holographic FOV. **b)** Axial  
681 locations in real space (units: microns, arbitrary origin) of holograms with equi-Z SLM coordinates across  
682 the holographic FOV. **c)** 3D remote-focusing fluorescence imaging planes in real space measured with an  
683 inverted substage camera with voice-coil curvature correction on. **d)** Power distribution variation in 3D  
684 measured as the normalized square-root of the 2P fluorescence signal for a distribution of holograms  
685 randomly positioned in 3D space. This distribution is used to build a 3D model of diffraction efficiency that  
686 is used to dynamically correct the power allocated to each hologram as a function of its location in space,  
687 thus allowing to use a greater range of the SLM.

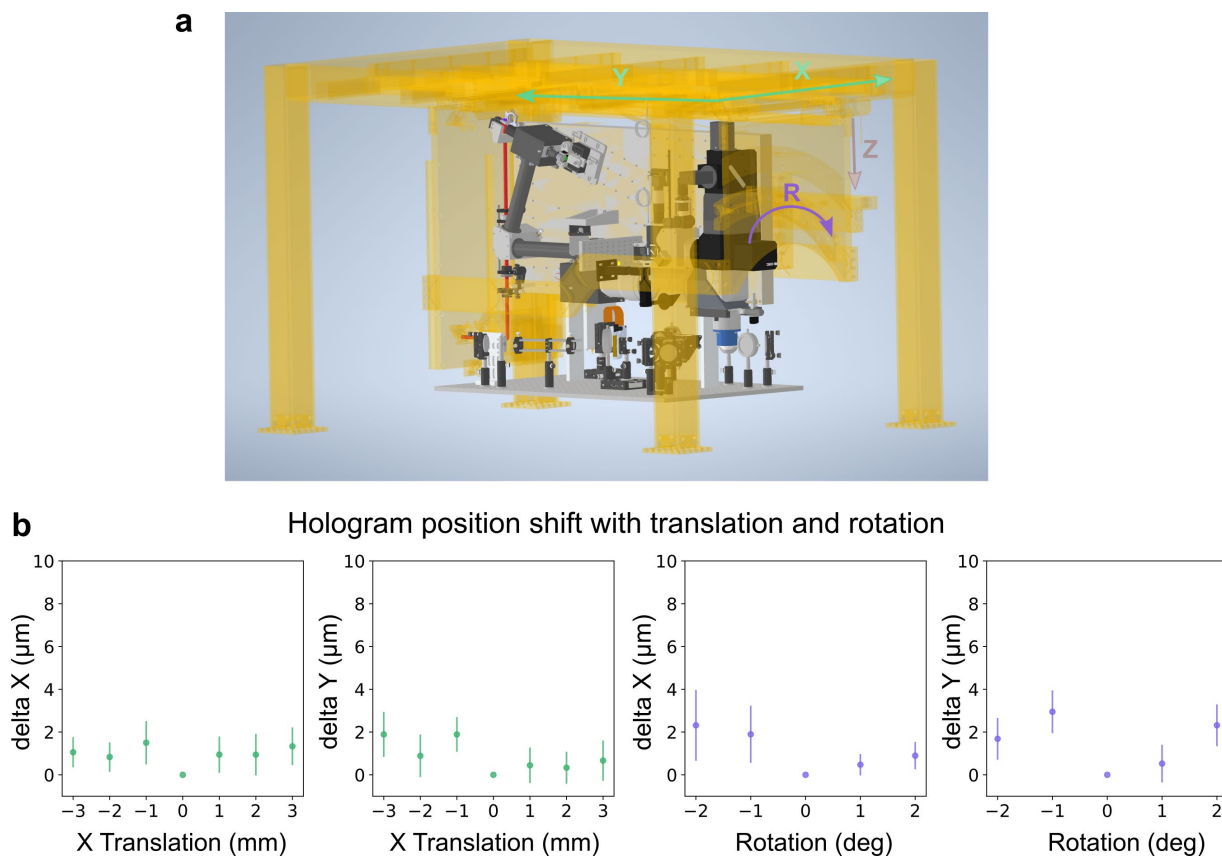

688

689 **Supplementary Figure 3. Targeting invariance with 2P-RAM mesoscope movement.** **a)** The microscope  
690 main frame is motorized in X, Y translation and rotation. The holographic module was designed to be  
691 solidary to the main frame thus preserving motion along these axes. Axial Z translation in the 2P-RAM  
692 mesoscope is implemented by moving the vertical breadboard relative to the main frame. To maintain  
693 holographic invariance, that axis was locked and replaced by a motorized lab jack (MLJ150, Thorlabs) to  
694 translate the animal axially relative to the microscope. **b)** Targeting invariance measured for translation  
695 and rotation of the microscope around a central reference position. Delta X and Y are computed,  
696 respectively, as the difference between the X and Y location of the centroids of holographically burnt holes  
697 in a fluorescent slide at the translated or rotated position and the X and Y location of the centroids in the  
698 central reference position. Markers: mean value, error bars: standard deviation.

699

700

701

702

703

704

705

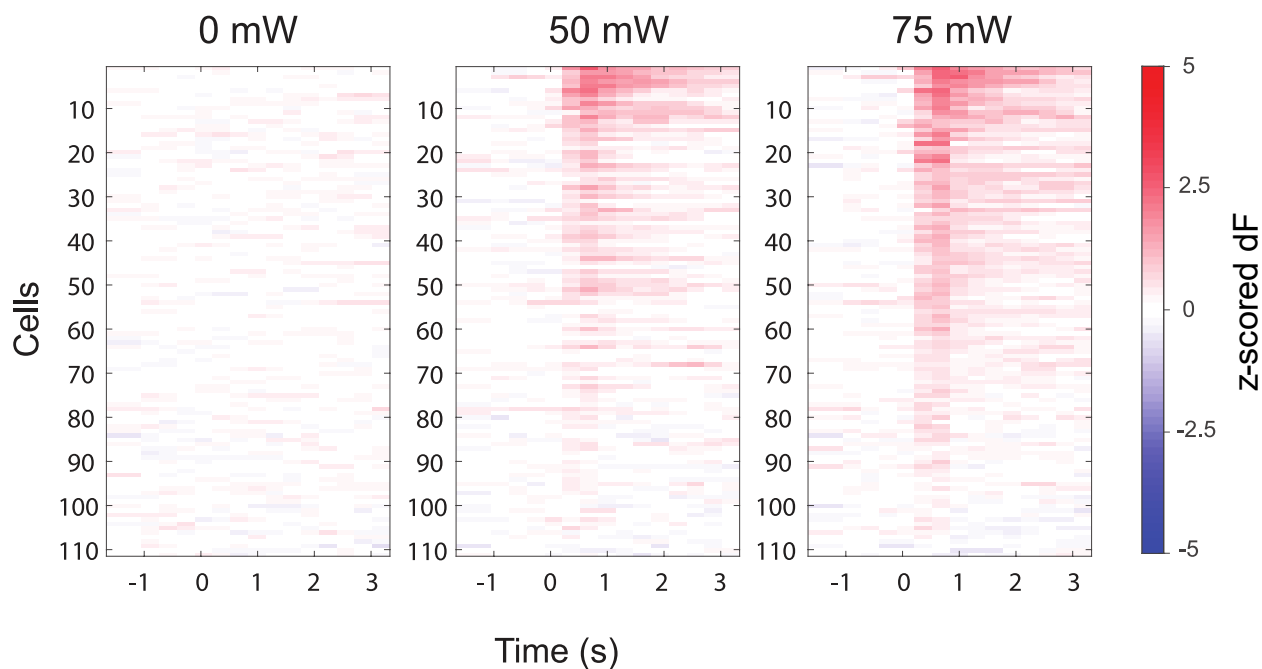

706

707 **Supplementary Figure 4. Sequential stimulation at different laser powers.** Heatmaps of stimulus-aligned  
708 calcium responses (z-scored dF) for 111 targeted cells in an example session (Ai203 x VGlut Cre  
709 transgenic). 13, 58 and 75 were significantly activated at 0, 50, and 75mW, respectively, signed rank test,  
710 one tailed  $p < 0.025$ ).

711

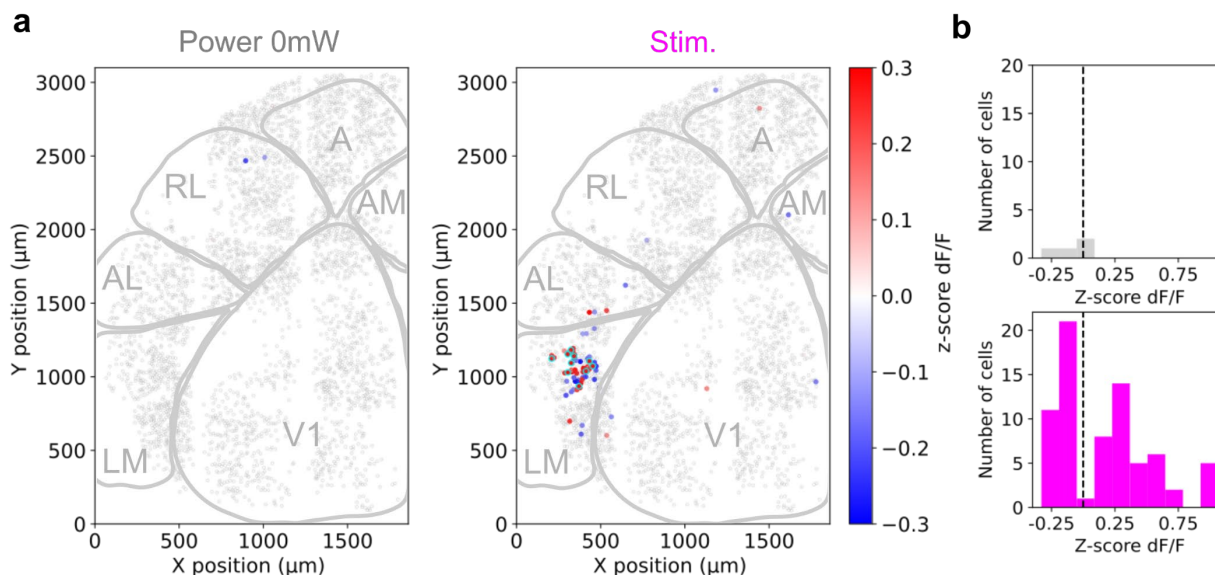

712

713 **Supplementary Figure 5. Cross-validated influence maps for holographic stimulation and no stimulation**  
714 **control.** a) Example mesoscale holographic 'influence' maps measured in response to no holographic  
715 stimulation (left) and to activation of an ensemble of LM neurons (right). Significantly modulated cells are

716 colored according to the amplitude of their calcium responses. Significantly modulated cells are selected  
717 as the intersection of significantly modulated cells (t-test p-value <0.05) across two random splits of the  
718 total number of trials. Non-modulated cells are displayed in gray. Holographic targets are circled in cyan.  
719 **b)** Distribution of the amplitude of the post-stimulation calcium responses of significantly modulated cells  
720 in response to holographic activation (magenta) compared to control trials with no stimulation (grey).

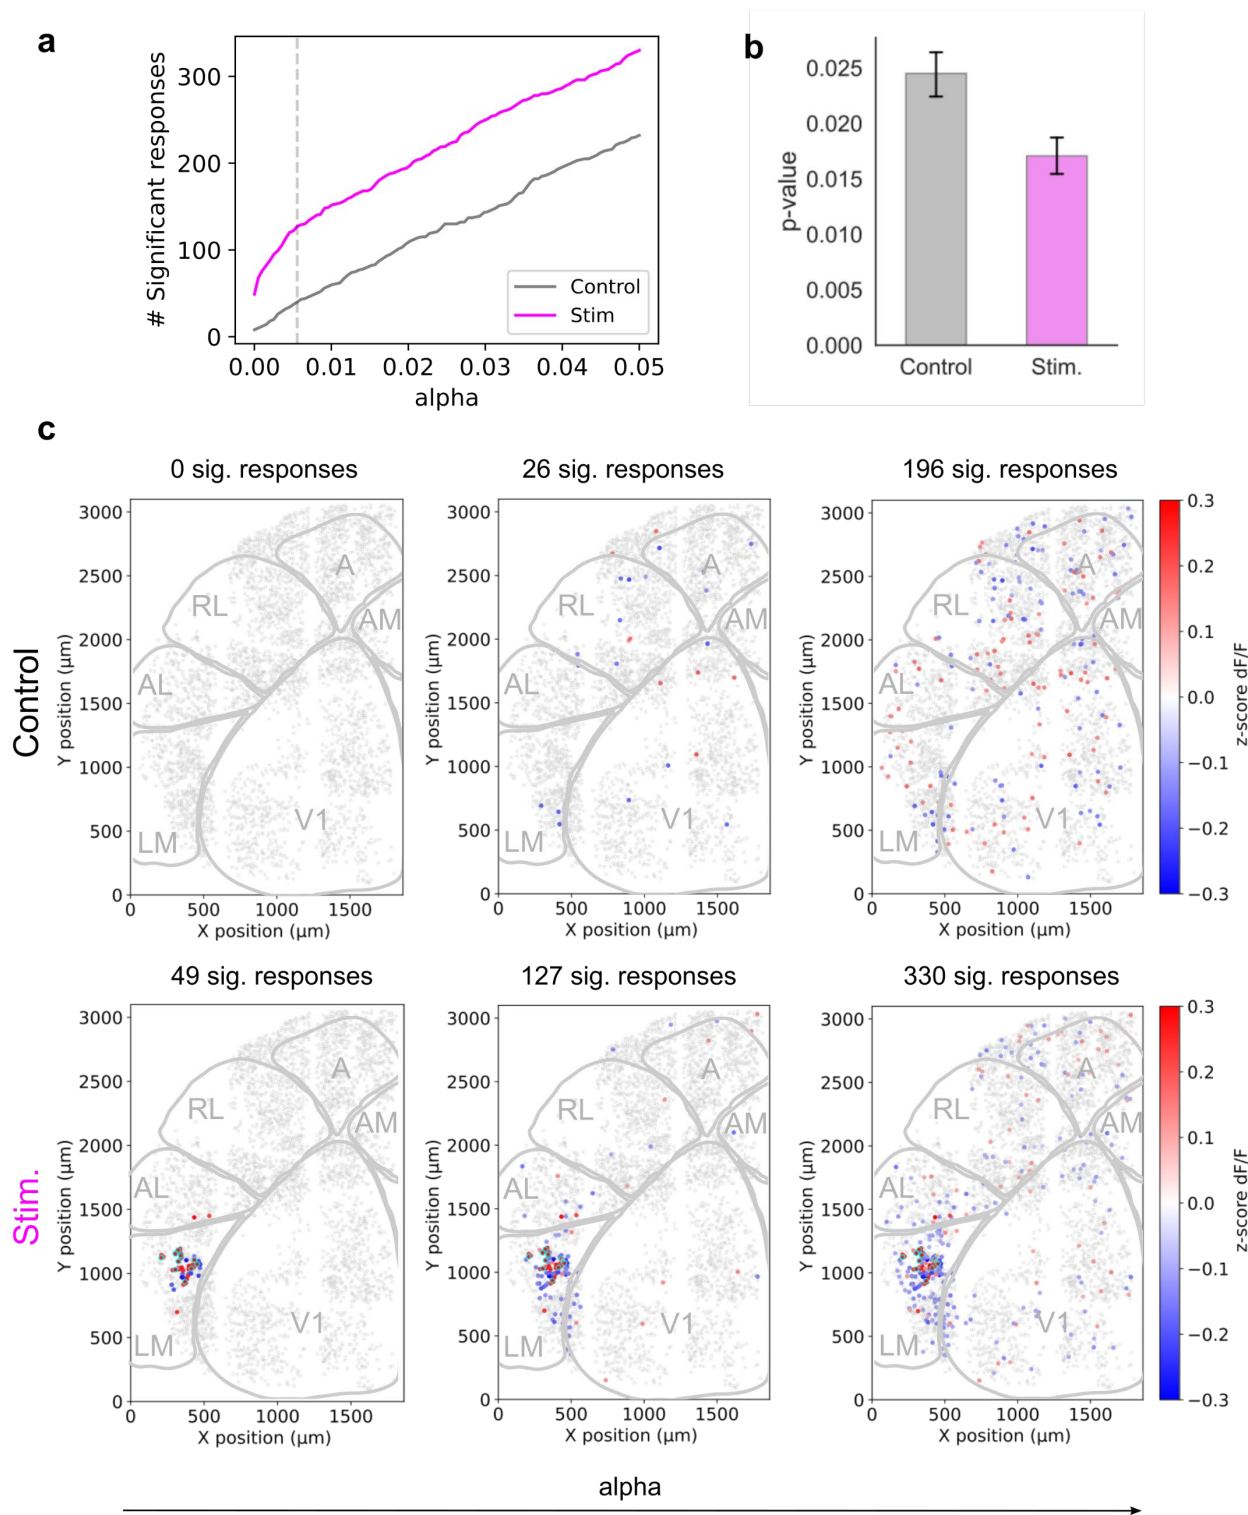

721



722 **Supplementary Figure 6. Significant modulations and false positive rates. a)** Number of significantly  
723 modulated cells in response to holographic activation and in response to the no stimulation control as a  
724 function of the significance level parameter alpha. Holographic stimulation consistently elicits more  
725 significant responses than the false positive rate. **b)** Average of p-values for significantly modulated cells  
726 (t-test, p-value <0.05) in the stimulation and no stimulation control condition. **c)** Maps of significantly  
727 modulated cells as a function of the significance level alpha parameter. Alpha parameter from left to right:  
728 Bonferroni (1.35E-05), Inflection point value in a) (5.6E-03), and 0.05.

729

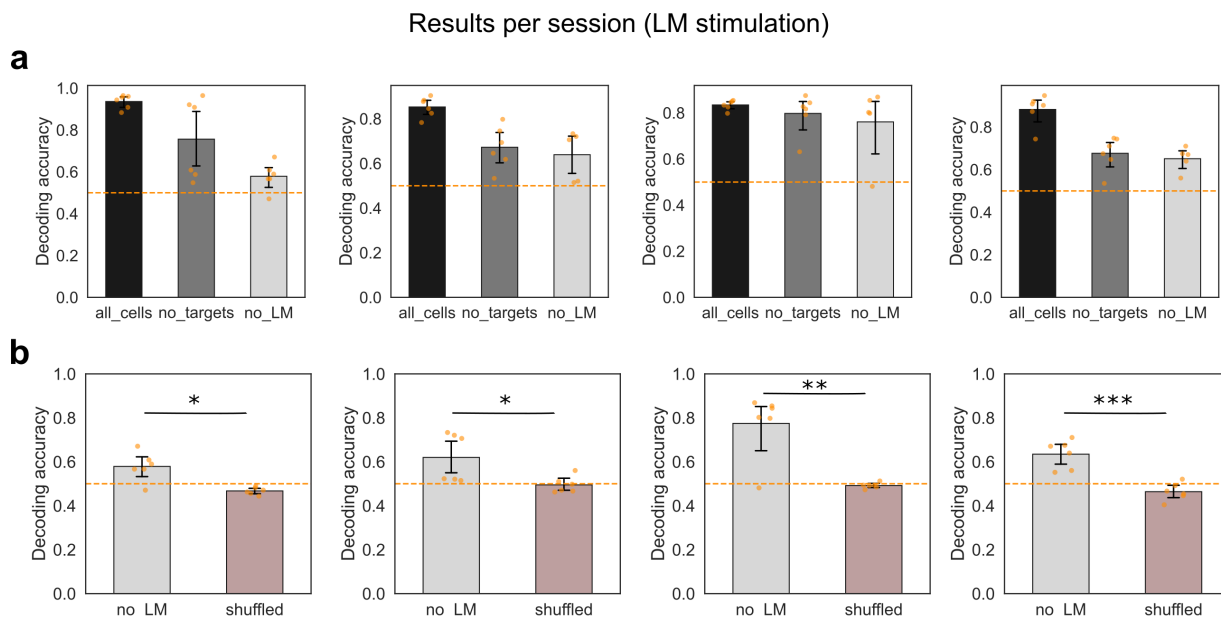

730

731 **Supplementary Figure 7. Photostimulus decoding results per session. a)** Decoding accuracy of a classifier  
732 trained to discriminate the holographically induced patterns in LM from different groups of non-targeted  
733 cells in the FOV, split per session. 6 pairs of stimuli are presented for discrimination in each session. All  
734 cells: decoding from all neurons in the mesoscale FOV. No targets: decoding from all neurons except the  
735 targeted cells. No LM: decoding from all neurons outside area LM. **b)** Decoding accuracy per session of a  
736 classifier trained to discriminate the holographically induced patterns in LM from all neurons outside area  
737 LM with correct and shuffled labels in the training set. Session1/Mouse1: p = 0.013, Session2/Mouse1: p  
738 = 0.023, Session1/Mouse2: p=0.005, Session2/Mouse2 : p = 0.0006.

739

740

741

742

743

744

## 745 **Supplementary note 1: Hologram axial resolution**

746 The 2P fluorescence signal of a temporally focused gaussian spot at the focus of the objective can be  
747 written as:

$$748 \quad S(r, z, t) = \frac{1}{\tau(z)f} I(r, z, t)^2$$

749 With  $\tau$  the pulse width,  $f$  the repetition rate,  $I$  the intensity profile at the focus,  $r$  the radial dimension(  
750  $r = \sqrt{x^2 + y^2}$ ) and  $z$  the axial dimension, both defined with the center of the gaussian spot as origin.  
751 Under the approximation that the linear chirp at the objective back aperture ( $\alpha\Omega$ , with  $\alpha$  a constant  
752 proportional to the grating groove density and  $\Omega$  the FWHM of the pulse frequency spectrum) is  
753 significantly smaller than the size of each monochromatic beamlet  $s$  ( $\sqrt{2\ln 2}s$  the FWHM of each  
754 monochromatic beamlet), the pulse width as a function of the axial depth  $z$  can be written as (cf.  
755 Papagiakoumou et al, 2020):

$$756 \quad \tau(z) \approx \frac{2\sqrt{2\ln 2}}{\Omega} \sqrt{1 + \frac{z^2}{z_R^2}}$$

757 With  $z_R = \frac{2f_{obj}^2}{k_0(s^2 + \alpha^2\Omega^2)}$ ,  $f_{obj}$  the objective focal length, and  $k_0$  the wavevector of the central frequency of  
758 the pulse.

759 The 2P fluorescence signal can then be written as:

$$760 \quad S(r, z, t) = \frac{\Omega}{2\sqrt{2\ln 2}f} \sqrt{1 + \frac{z^2}{z_R^2}} I(r, z, t)^2$$

761 When injecting into this model numerical values corresponding to a conventional 2P objective (here  
762 Olympus 20X 1.0 NA  $f_{obj} = 9\text{mm}$  and 18mm back aperture size) and values corresponding to the 2P-RAM  
763 mesoscope objective (0.6 NA  $f_{obj} = 21\text{mm}$ , 25mm back aperture size), we were able to obtain, for a 400 fs  
764 pulse width at 1 MHz and at 1.03  $\mu\text{m}$  wavelength, a cut-off threshold at the tail of the distributions  
765 corresponding to empirically observed axial hologram sizes:  $\sim 30\mu\text{m}$  for the 2P-RAM mesoscope and  
766  $\sim 20\mu\text{m}$  for the conventional 2P microscope (cf. Pégard 2017, Mardinly 2018). The large back aperture of  
767 the mesoscope objective seems to partially compensate for the lower NA regarding axial temporal  
768 focusing resolution.

## 769 **Supplementary note 2: Assembly and alignment guide**

770 Detailed documentation on mesoscope assembly and alignment is available on the Janelia open wiki  
771 <https://wiki.janelia.org/wiki/display/mesoscopy/Documentation>. We focus below on the specifics for  
772 adding a 2P holographic module to the Janelia/Thorlabs mesoscope.

### 773 A) Prerequisites:

774 Adding a 2P holographic photostimulation path onto the mesoscope required some custom parts  
775 and modifications to the original mesoscope parts. Items 1-3 below were designed in  
776 collaboration with Thorlabs who manufactured the final parts. All the part designs are available

777 on the CAD file attached. We do however encourage scientists willing to upgrade their system to  
778 reach to Thorlabs for assistance with the items 1-3 upgrades.

- 779
- 780 1. The third scan relay (scan lens and tube lens assembly) needs to be opened to merge the  
781 imaging and photostimulation beams. See CAD file for aperture size and position.

782

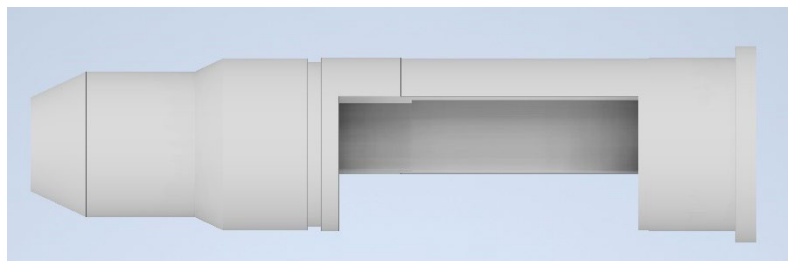

783

784 *Modified relay mount.*

785

- 786 2. The 2P holographic path is set up on a horizontal custom 33" × 24" × 0.5" aluminum  
787 breadboard (Thorlabs) attached to the main motorized mesoscope frame (gantry). The  
788 breadboard is attached to the gantry through two custom support clamps in the back  
789 (Thorlabs) and one custom L-bracket on the front (Thorlabs). Securing the L-shape bracket in  
790 place required drilling 4 ¼"-20 tapped holes on the mesoscope rotation hub.

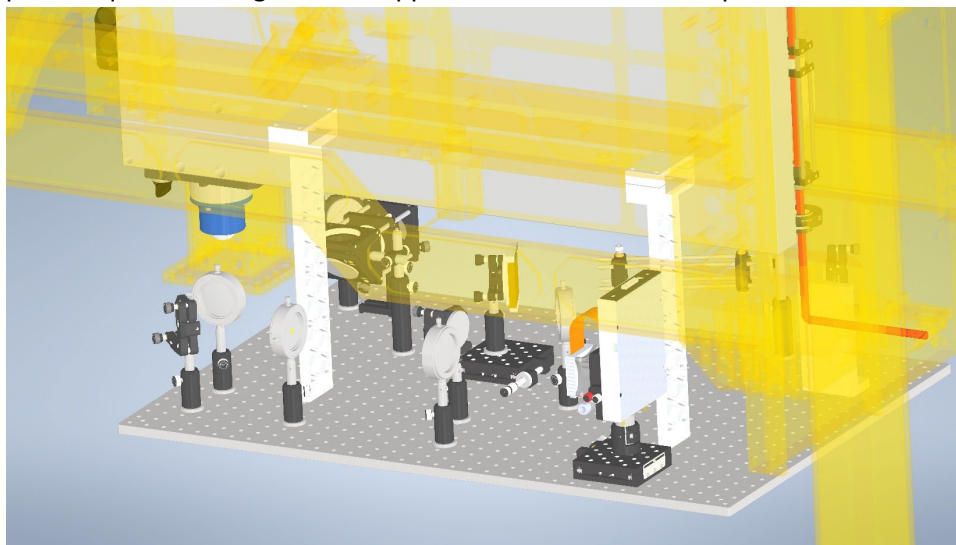

791

792

793

*Back support clamps.*

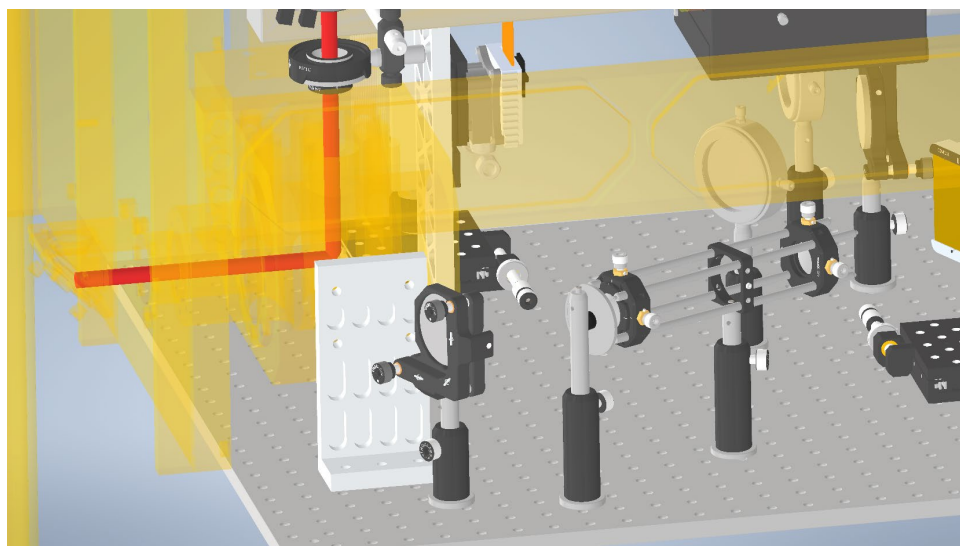

794  
795  
796  
797  
798

*L-bracket attached to the mesoscope rotation hub.*

3. A custom threaded bracket (Thorlabs) was used to attach the recombination dichroic D3 onto the vertical mesoscope breadboard.

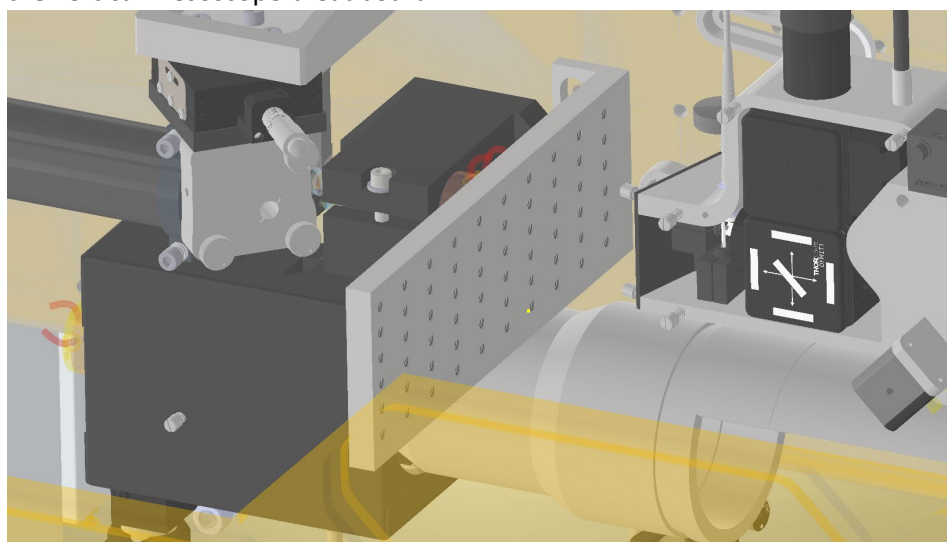

799  
800  
801  
802  
803  
804  
805  
806

*Bracket to attach the recombination dichroic holder to the mesoscope.*

4. A custom 3D-printed holder is used to flexibly position the recombination dichroic D3 on the mesoscope scan path. The holder allows flexible positioning across 3 translation directions and one rotation axis and was designed to hold a standard  $\frac{1}{2}$ " Thorlabs post. The dichroic is secured in place with a FFM1 holder (Thorlabs) secured on a B3C mount (Thorlabs).

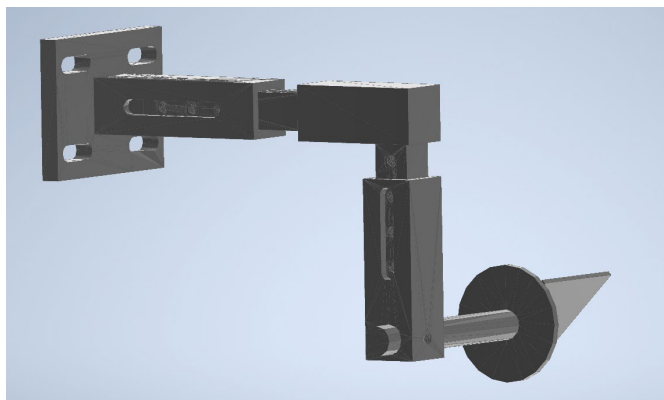

807  
808 *Recombination dichroic holder.*  
809

810 5. To maintain axial alignment, the motorized axial movement of the vertical breadboard  
811 relative to the gantry is locked and replaced with an external motorized lab jack (Thorlabs,  
812 MLJ150).

813 B) Assembly and alignment:

814 1. Once the breadboard is installed, pre-position all breadboard optics to match the 4f  
815 requirements using the CAD layout as a guide.

816 2. Align the imaging beam up until the rotation hub to be centered on each of the gantry periscope  
817 mirrors (M1,M2,M3,M4,M5) and perfectly stationary with the gantry's X and Y translation.

818 3. Remove the last periscope mirror (M6) and place the provided rotation alignment tool. If step  
819 2 is done properly, M5 is enough to steer the beam to be centered and leveled along the rotation axis and  
820 to have the beam position invariant with rotation.

821 4. Inject the stimulation beam onto the periscope so that the beam is co-aligned to the imaging  
822 beam i.e centered on all mirrors and invariant with X, Y and rotation. For this step only the D1 dichroic  
823 and mirrors external to the gantry periscope can be used. Consider having the recombination dichroic D1  
824 installed on a lateral translation stage to have an additional degree of freedom for co-alignment.

825 5. Given the natural divergence of the laser beam and the long distances on the mesoscope, the  
826 beam should be quite expanded on the rotation alignment tool. To correct for that, we added a 1:1  
827 telescope before the gantry (lenses L01 & L02) to have a more collimated beam impinging on the grating.  
828 The lenses of the telescope need to be placed centered on the beam so that the beam remains  
829 undeflected. L02 could be placed on a translation stage to allow for easier adjustment of the divergence  
830 while maintaining the alignment. Fine adjustments of the imaging/stimulation beam co-alignment can be  
831 made after the telescope is installed (again, only with mirrors external to the gantry or with the D1  
832 dichroic).

833 6. Remove the rotation alignment tool and replace M6 with the D2 dichroic. At this stage, the  
834 imaging and stimulation beams can now be aligned independently.

835 7. Remove the rotation alignment tool and replace M6 with the D2 dichroic. At this stage, the  
836 imaging and stimulation beams can now be aligned independently.

837 8. Subsequent alignment of the imaging path on the vertical breadboard is now constrained since  
 838 only D2 can now be used to route the beam straight on the pre-RF vertical axis. Therefore, depending on  
 839 how the system has been originally set, the whole pre-RF vertical axis might need to be translated  
 840 horizontally so that the beam can be straight and vertical along that axis.

841 9. After steps 4 and 5, the stimulation beam should be perfectly leveled impinging on the grating.  
 842 Adjust the angle of the grating to minimize power lost at higher diffraction orders. Then iterate adjusting  
 843 the height and position of the relay rail and adjusting the tip/tilt on the grating mount so that ultimately  
 844 the beam is perfectly centered on L1 and L2.

845 10. Install the spinning diffuser and adjust the subsequent mirror to stay leveled at the beam  
 846 height and to hit the SLM injection mirror while being centered and on-axis on the L3 lens.

847 11. Load a flat phase on the SLM (or simply turn it off). Use the pre-SLM injection mirror and the  
 848 tip-tilt knobs on the SLM to make the beam centered and leveled on the L4 axis. Having the SLM set on a  
 849 translation stage can be helpful at this stage since it allows to correct for any clipping issue without  
 850 changing the angle of the SLM. If the beam is properly centered on the SLM, the beam after L4 should  
 851 look like a full rectangle beam on an IR card. With subsequent mirrors, the beam should then be aligned  
 852 to be centered and leveled on the L5 and L6 axes. Prior to this, the cage rail system holding L6 needs to  
 853 be pre-positioned precisely under the imaging relay aperture so that a 90° beam exiting the cage system  
 854 is centered on the imaging scan relay vertical axis.

855 12. Place the recombination dichroic D3 in order to have the stimulation beam centered on the  
 856 mesoscope objective back aperture. Iterate between the position and angle of D3 and the tip/tilt knob of  
 857 the last cage mirror to have the beam both centered on the back aperture of the objective and straightly  
 858 vertical on the objective axis.

859 **Supplementary table 1 – List of optical components (holography path)**

|         |                                                                                                                |
|---------|----------------------------------------------------------------------------------------------------------------|
| L01     | Achromatic doublet f = 50 mm, AC254-50-B. <b>Thorlabs, USA</b>                                                 |
| L02     | Achromatic doublet f = 50 mm, AC254-50-B. <b>Thorlabs, USA</b>                                                 |
| D1      | Shortpass Dichroic Mirror, DMSP1000R. <b>Thorlabs, USA</b>                                                     |
| D2      | 980 nm laser BrightLine single-edge dichroic beamsplitter, 25 mm diameter. <b>AVR Optics, USA</b>              |
| G       | Diffraction Grating, Plane Ruled 50 × 50 mm, 1000nm, 600Gr/mm, 33010FL01-520R. <b>Newport Corporation, USA</b> |
| L1      | Achromatic doublet f = 125 mm, AC254-125-B-LM. <b>Thorlabs, USA</b>                                            |
| L2      | Aspheric Lens f = 20mm, AL2520H-B. <b>Thorlabs, USA.</b>                                                       |
| D       | 0.5° Diffusing Angle 50 mm, #47-989. <b>Edmund Optics, USA</b>                                                 |
| L3      | Achromatic doublet f = 500 mm, ACT508-500-B. <b>Thorlabs, USA</b>                                              |
| SLM     | 1920 × 1152 Phase Series Spatial Light Modulator, <b>Medowlark Optics, USA</b>                                 |
| L4      | Achromatic doublet f = 150 mm, AC508-150-B. <b>Thorlabs, USA</b>                                               |
| L5      | Achromatic doublet f = 300 mm, ACT508-300-B. <b>Thorlabs, USA</b>                                              |
| L6      | Achromatic doublet f = 200 mm, ACT508-200-B. <b>Thorlabs, USA</b>                                              |
| D3      | 1040 nm StopLine notch laser dichroic, 50 × 50 mm. <b>AVR Optics USA</b>                                       |
| D4      | Shortpass Dichroic Mirror, DMSP1000R. <b>Thorlabs, USA</b>                                                     |
| Mirrors | Broadband dielectric mirrors, BB2-E03. <b>Thorlabs, USA</b>                                                    |

860 Refer to CAD file for optomechanical parts.

861

862

863 **Supplementary table 2 – Groupe delay dispersion estimation (holography path)**

|           | Part #             | Material | Thickness (mm) | GVD at 1.03 $\mu\text{m}$<br>(fs <sup>2</sup> /mm) | GDD at 1.03 $\mu\text{m}$<br>(fs <sup>2</sup> ) |
|-----------|--------------------|----------|----------------|----------------------------------------------------|-------------------------------------------------|
| L01       | AC254-50-B         | N-LAK22  | 7.5            | 43.78                                              | 328.35                                          |
|           |                    | N-SF6HT  | 1.8            | 241.67                                             | 435.006                                         |
| L02       | AC254-50-B         | N-LAK22  | 7.5            | 43.78                                              | 328.35                                          |
|           |                    | N-SF6HT  | 1.8            | 241.67                                             | 435.006                                         |
| L1        | AC254-125-B        | N-BK7    | 6              | 25.123                                             | 150.738                                         |
|           |                    | N-SF8    | 6              | 88.483                                             | 530.898                                         |
| L2        | AL2520H-B          | S-LAH64  | 7.6            | 63.455                                             | 482.258                                         |
| L3        | ACT508-500-B       | N-SK2    | 6              | 41.15                                              | 246.9                                           |
|           |                    | N-SF5    | 6              | 155.86                                             | 935.16                                          |
| L4        | AC508-150-B        | N-LAK22  | 8.2            | 43.78                                              | 358.996                                         |
|           |                    | N-SF6HT  | 5              | 241.67                                             | 1208.35                                         |
| L5        | ACT508-300-B       | N-SK2    | 8              | 41.15                                              | 329.2                                           |
|           |                    | N-SF11   | 6              | 125.35                                             | 752.1                                           |
| L6        | ACT508-200-B       | N-SK2    | 8.2            | 41.15                                              | 337.43                                          |
|           |                    | N-SF57   | 5              | 271.33                                             | 1356.65                                         |
| Tube lens | Jenoptiks/Thorlabs |          |                |                                                    | 1.20E+03                                        |
| Objective | Jenoptiks/Thorlabs |          |                |                                                    | 5775                                            |

864

865 The total group delay dispersion (GDD) introduced by the holographic path is estimated at 15190 fs<sup>2</sup>.

866

867

868

869

870

871

872
